# Supplementary material for: Biosourced mesoporous carbon with embedded palladium nanoparticles by a one pot soft-template synthesis: application to Suzuki reactions
Source: Royal Society of Chemistry journal article supplement (doi:10.1039/c4ta06478j), 2015-01-01
Supplement: c4ta06478j1.pdf [file c4ta06478j1.pdf]

## SUPPORTING INFORMATION

### Complementary TEM experiments

For a better understanding of the local influence of Pd NPs on their surrounding porosity, a detailed analysis of the general aspect of the carbon matrix above and below the Pd particles is shown in Figure SI1. The slices presented in Figures SI1a and SI1c show clearly that before and after several nm thickness from the NPs (Figure SI1b), the general aspect of the C support is the same as in areas containing no Pd particles. It confirms that the particles are surrounded by large voids within the C support with local distortion of the worm-like mesoporous framework around them.

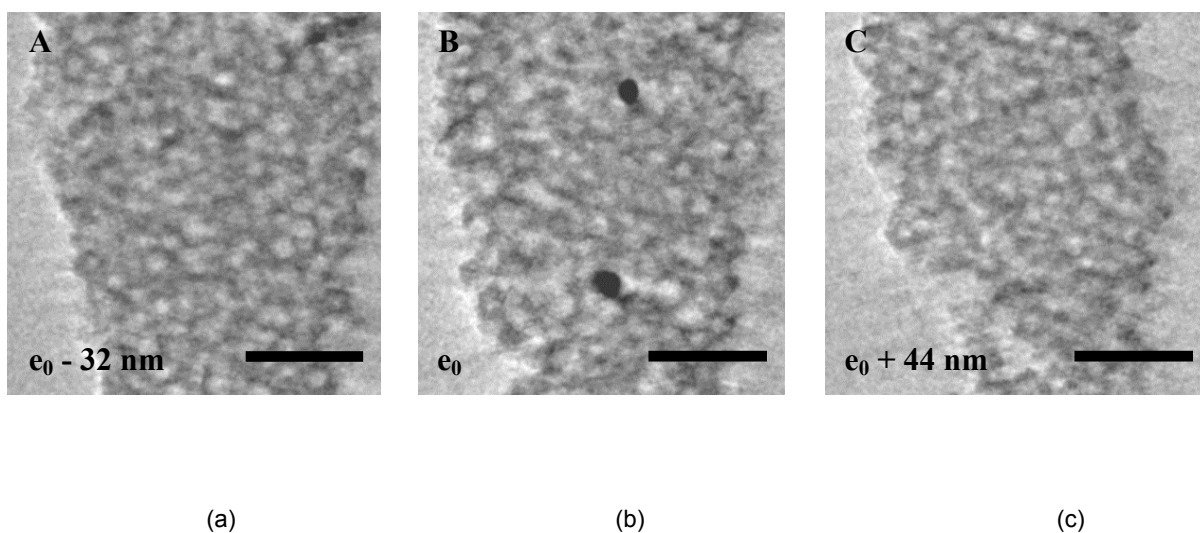

Figure SI1. Representative slices details extracted from the reconstructed volume of Pd@MC X3 sample to evidence the influence of metallic Pd nanoparticles on the porosity: a) slice at thickness  $e_0 - 32 \text{ nm}$ ; b) slice of reference at thickness  $e_0$  and b) slice at thickness  $e_0 + 44 \text{ nm}$ . The scale in the three slices is 100 nm.

## N<sub>2</sub> adsorption/desorption isotherms of Pd@MCXi materials

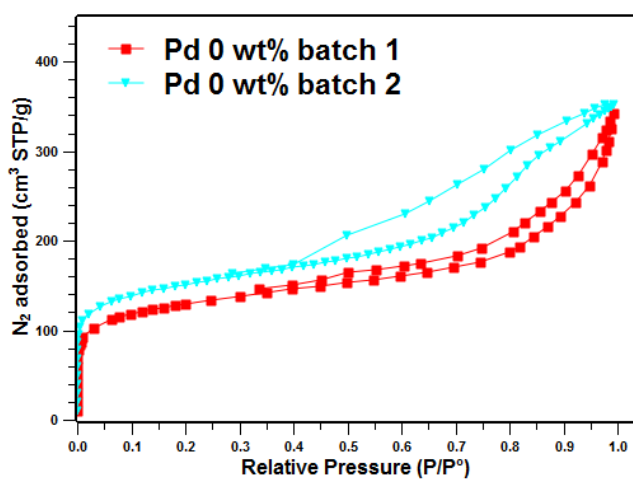

(a)

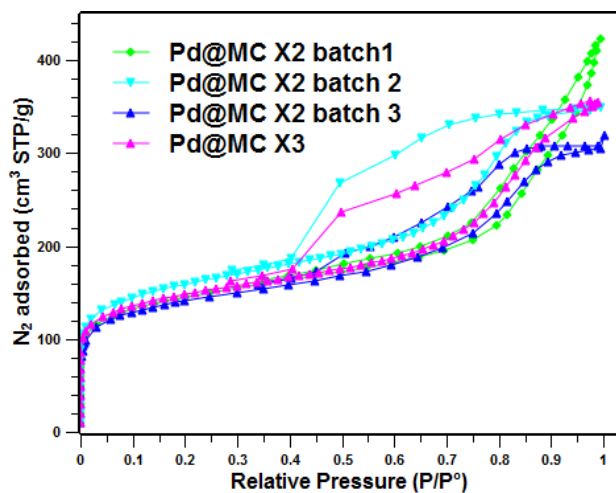

(b)

Figure S12: N<sub>2</sub> adsorption/desorption isotherms measured at 77K on (a) tanin-derived carbon samples and, (b) Pd@MC Xi samples. The figure evidences the variability of the synthesis and the negligible influence of Pd<sup>2+</sup> traces on the pore size distribution.

## **<sup>1</sup>H and <sup>13</sup>C-NMR Spectra of Biaryls 1a-i**

**1-(4-Biphenyl)ethanone (1a):** Elution with AcOEt / cyclohexane 5:95 as eluant afforded **1a** as a white solid (195 mg, 98% yield). <sup>1</sup>H-NMR (400 MHz, CDCl<sub>3</sub>) δ (ppm): 2.65 (s, 3H), 7.45 (m, 3H), 7.64 (d, <sup>3</sup>J(H,H) = 7.0 Hz, 2H), 7.70 (d, <sup>3</sup>J(H,H) = 6.7 Hz, 2H), 8.05 (d, <sup>3</sup>J(H,H) = 6.7 Hz, 2H).<sup>[1]</sup> <sup>13</sup>C NMR (75 MHz, CDCl<sub>3</sub>) δ (ppm): 26.6, 127.2, 128.0, 128.8, 135.8, 139.8, 145.7, 197.7.

**4-Methoxybiphenyl (1b):** Elution with AcOEt / cyclohexane 5:95 afforded **1b** as a white solid (177 mg, 96% yield). <sup>1</sup>H NMR (300 MHz, CDCl<sub>3</sub>) δ (ppm): 3.88 (s, 3H), 7.01 (d, <sup>3</sup>J(H,H) = 8.8 Hz, 2H), 7.33 (t, <sup>3</sup>J(H,H) = 7.3 Hz, 1H), 7.44 (m, 2H), 7.58 (m, 4H).<sup>[3]</sup> <sup>13</sup>C NMR (75 MHz, CDCl<sub>3</sub>) δ (ppm): 55.3, 114.2, 126.7, 128.1, 128.7, 133.7, 140.8, 159.1.

**4-Methylbiphenyl (1c):** Elution with AcOEt / cyclohexane 1:99 afforded **1c** as a white solid (160 mg, 95% yield). <sup>1</sup>H NMR (400 MHz, CDCl<sub>3</sub>) δ (ppm): 2.30 (s, 3H), 7.17 (m, 3H), 7.33 (t, <sup>3</sup>J(H,H) = 7.6 Hz, 2H), 7.40 (d, <sup>3</sup>J(H,H) = 8.4 Hz, 2H), 7.49 (d, <sup>3</sup>J(H,H) = 8.4 Hz, 2H).<sup>[3]</sup> <sup>13</sup>C NMR (100 MHz, CDCl<sub>3</sub>) δ (ppm): 21.1, 127.0, 129.3, 129.5, 137.0, 138.4, 141.2.

**3-Methylbiphenyl (1d):** Elution with AcOEt / cyclohexane 1:99 afforded **1d** as a colorless oil (165 mg, 98% yield). <sup>1</sup>H NMR (300 MHz, CDCl<sub>3</sub>) δ (ppm): 2.45 (s, 3H), 7.20 (m, 1H), 7.40 (m, 6H), 7.63 (d, <sup>3</sup>J(H,H) = 7.3 Hz, 2H).<sup>[3]</sup> <sup>13</sup>C NMR (75 MHz, CDCl<sub>3</sub>) δ (ppm): 21.5, 124.2, 127.2, 127.6, 128.7, 138.3, 141.2, 178.3.

**2-Methylbiphenyl (1e):** Elution with AcOEt / cyclohexane 1:99 afforded **1e** as a yellowish oil (166 mg, 99% yield). <sup>1</sup>H NMR (300 MHz, CDCl<sub>3</sub>) δ (ppm): 2.19 (s, 3H), 7.16 (m, 4H), 7.26 (m, 3H), 7.32 (m, 2H).<sup>[3]</sup> <sup>13</sup>C NMR (75 MHz, CDCl<sub>3</sub>) δ (ppm): 20.5, 125.7, 126.7, 126.8, 128.0, 129.1, 129.2, 130.1, 130.3, 135.3, 141.9.

**2-Isopropylbiphenyl (2d):** Elution with Et<sub>2</sub>O / Cyclohexane 1 : 99 afforded 137 mg (70% yield) of a colorless oil. <sup>1</sup>H NMR (400 MHz, CDCl<sub>3</sub>) δ (ppm): 1.07 (d, <sup>3</sup>J(H,H) = 6.9 Hz, 6H), 2.97 (hept, <sup>3</sup>J(H,H) = 6.9 Hz, 1H), 7.15 (m, 9H).<sup>[29]</sup> <sup>13</sup>C NMR (100 MHz, CDCl<sub>3</sub>) δ (ppm): 24.3, 29.3, 125.3, 125.5, 126.7, 127.6, 127.9, 129.3, 141.0, 142.1, 146.3.

**1-(4-(4'-Methyl)biphenyl)ethanone (1g):** Elution with AcOEt / cyclohexane 5:95 afforded **1g** as a white solid (203 mg, 97% yield). <sup>1</sup>H NMR (400 MHz, CDCl<sub>3</sub>) δ (ppm): 2.30 (s, 3H), 2.52 (s, 3H), 7.17 (d,

$^3J(\text{H,H}) = 8.1$  Hz, 2H), 7.42 (d,  $^3J(\text{H,H}) = 8.1$  Hz, 2H), 7.56 (d,  $^3J(\text{H,H}) = 8.3$  Hz, 2H), 7.90 (d,  $^3J(\text{H,H}) = 8.3$  Hz, 2H).<sup>[2]</sup>  $^{13}\text{C}$  NMR (100 MHz,  $\text{CDCl}_3$ )  $\delta$  (ppm): 21.0, 26.5, 126.8, 126.9, 128.8, 129.6, 136.8, 137.6, 145.6, 197.6.

**1-(4-(2'-Methyl)biphenyl)ethanone (1h):** Elution with AcOEt / cyclohexane 5:95 afforded **1h** as a colorless oil (196 mg, 93% yield).  $^1\text{H}$  NMR (300 MHz,  $\text{CDCl}_3$ )  $\delta$  (ppm): 2.29 (s, 3H), 2.65 (s, 3H), 7.26 (m, 4H), 7.44 (d,  $^3J(\text{H,H}) = 8.5$  Hz, 2H), 8.03 (d,  $^3J(\text{H,H}) = 8.5$  Hz, 2H).<sup>[5]</sup>  $^{13}\text{C}$  NMR (100 MHz,  $\text{CDCl}_3$ )  $\delta$  (ppm): 20.2, 26.5, 125.8, 127.8, 128.1, 129.2, 129.3, 130.4, 134.9, 140.6, 146.8, 197.6.

**1-(4-(4'-Methoxy)biphenyl)ethanone (1i):** Elution with AcOEt / cyclohexane 5:95 afforded **1i** as a white solid (210 mg, 93% yield).  $^1\text{H}$  NMR (300 MHz,  $\text{CDCl}_3$ )  $\delta$  (ppm): 2.62 (s, 3H), 3.86 (s, 3H), 7.00 (d,  $^3J(\text{H,H}) = 8.8$  Hz, 2H), 7.58 (d,  $^3J(\text{H,H}) = 8.8$  Hz, 2H), 7.64 (d,  $^3J(\text{H,H}) = 8.3$  Hz, 2H), 8.00 (d,  $^3J(\text{H,H}) = 8.3$  Hz, 2H).<sup>[5]</sup>  $^{13}\text{C}$  NMR (100 MHz,  $\text{CDCl}_3$ )  $\delta$  (ppm): 26.5, 55.3, 114.3, 126.5, 128.3, 128.9, 132.1, 135.2, 145.2, 159.8, 197.6.

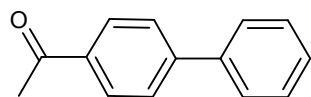

Compound **1a**  
 $^1\text{H-NMR}$ , 400 MHz,  $\text{CDCl}_3$

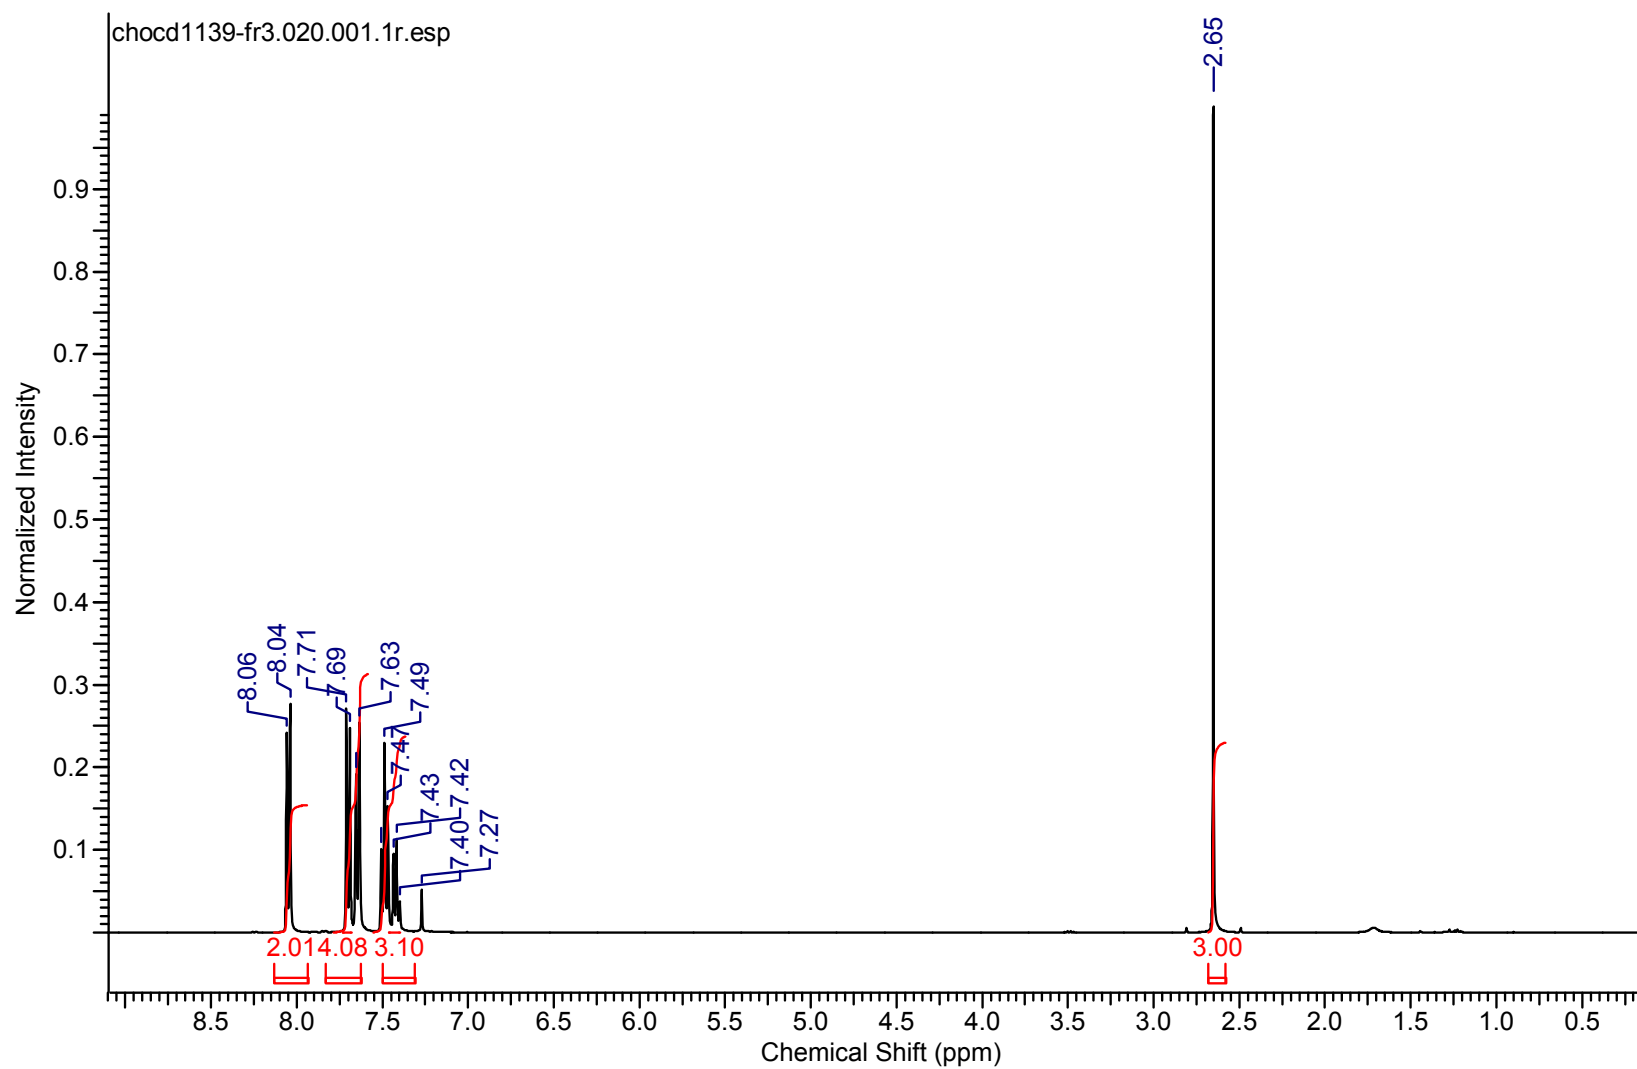

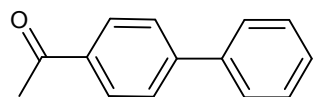

Compound **1a**

$^{13}\text{C}$ -NMR, 75 MHz,  $\text{CDCl}_3$

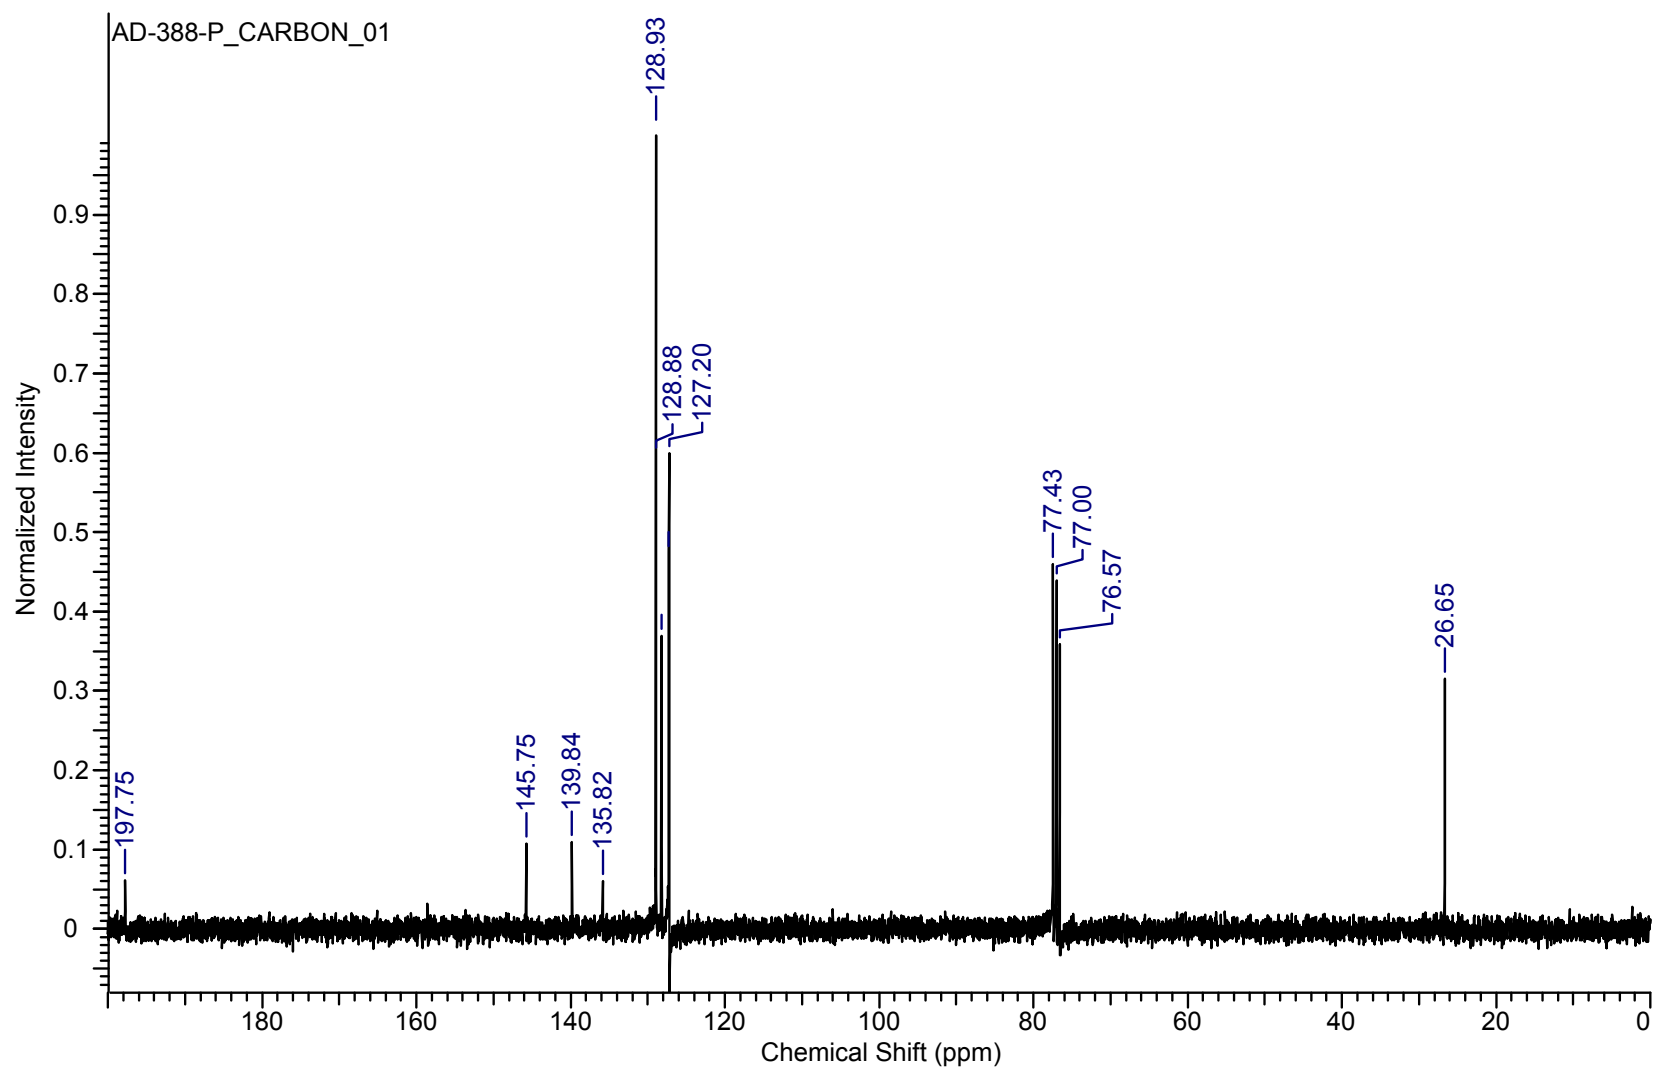

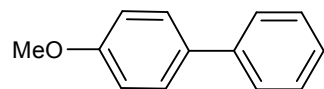

Compound **1b**

$^1\text{H-NMR}$ , 300 MHz,  $\text{CDCl}_3$

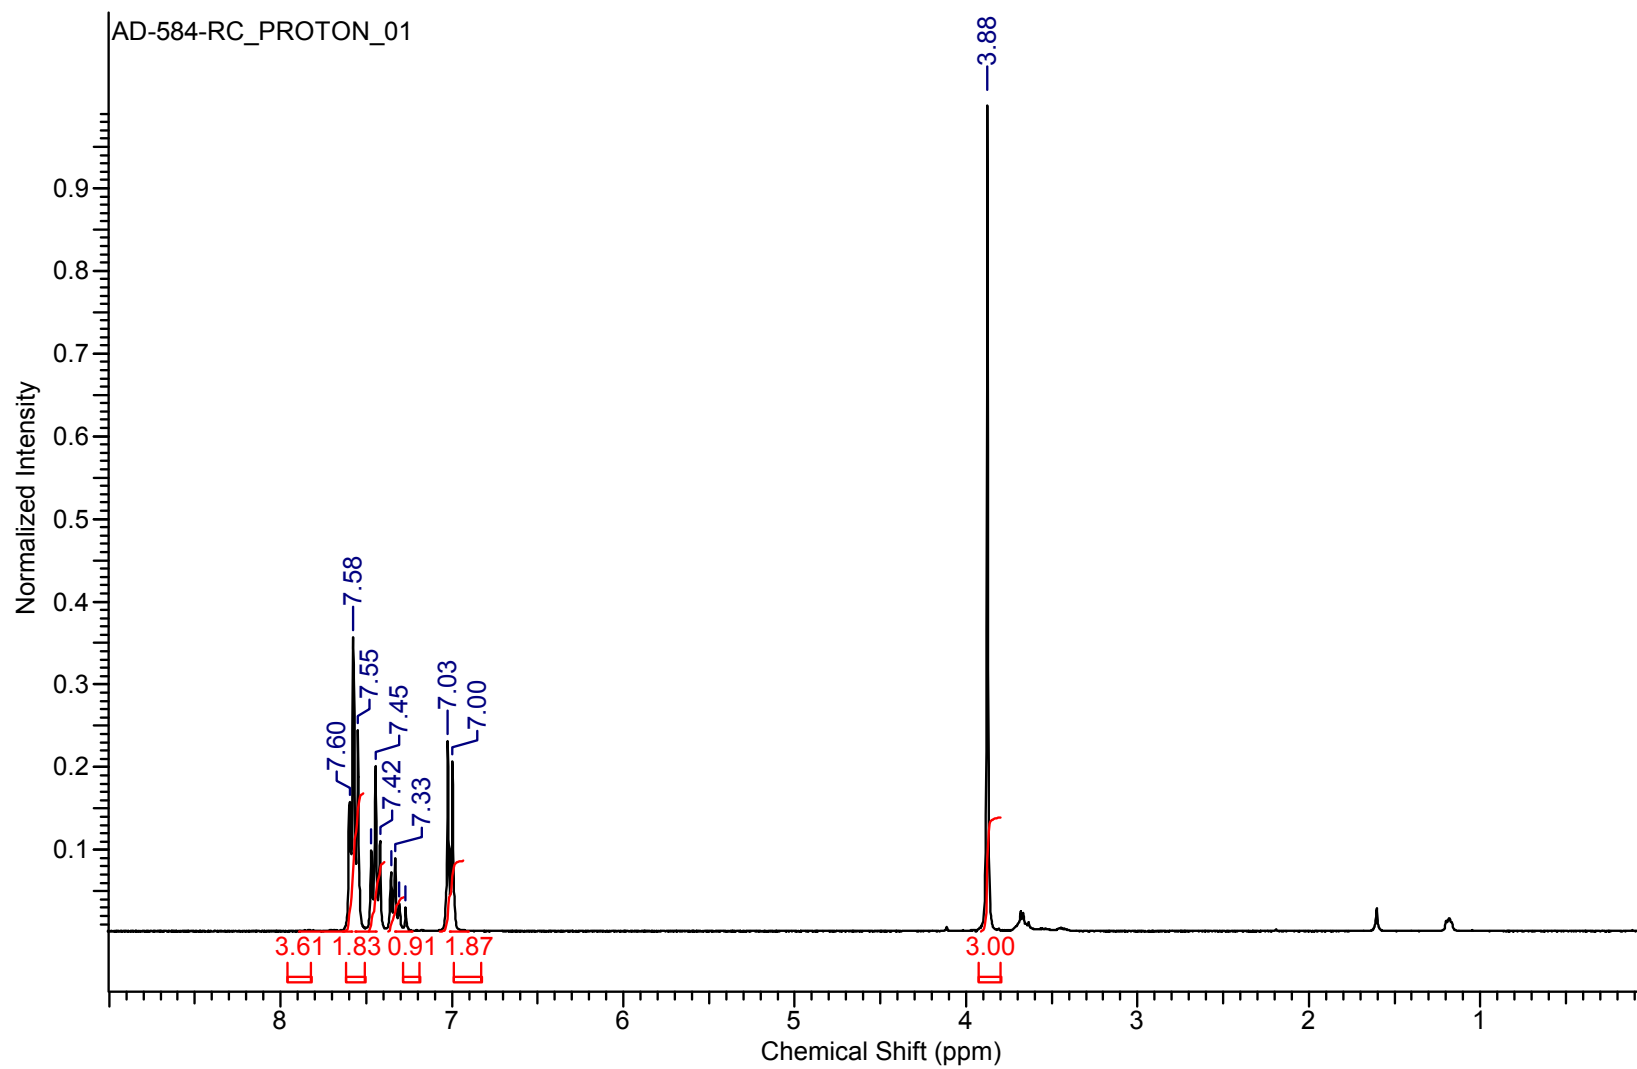

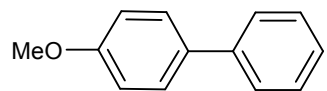

Compound **1b**

$^{13}\text{C}$ -NMR, 75 MHz,  $\text{CDCl}_3$

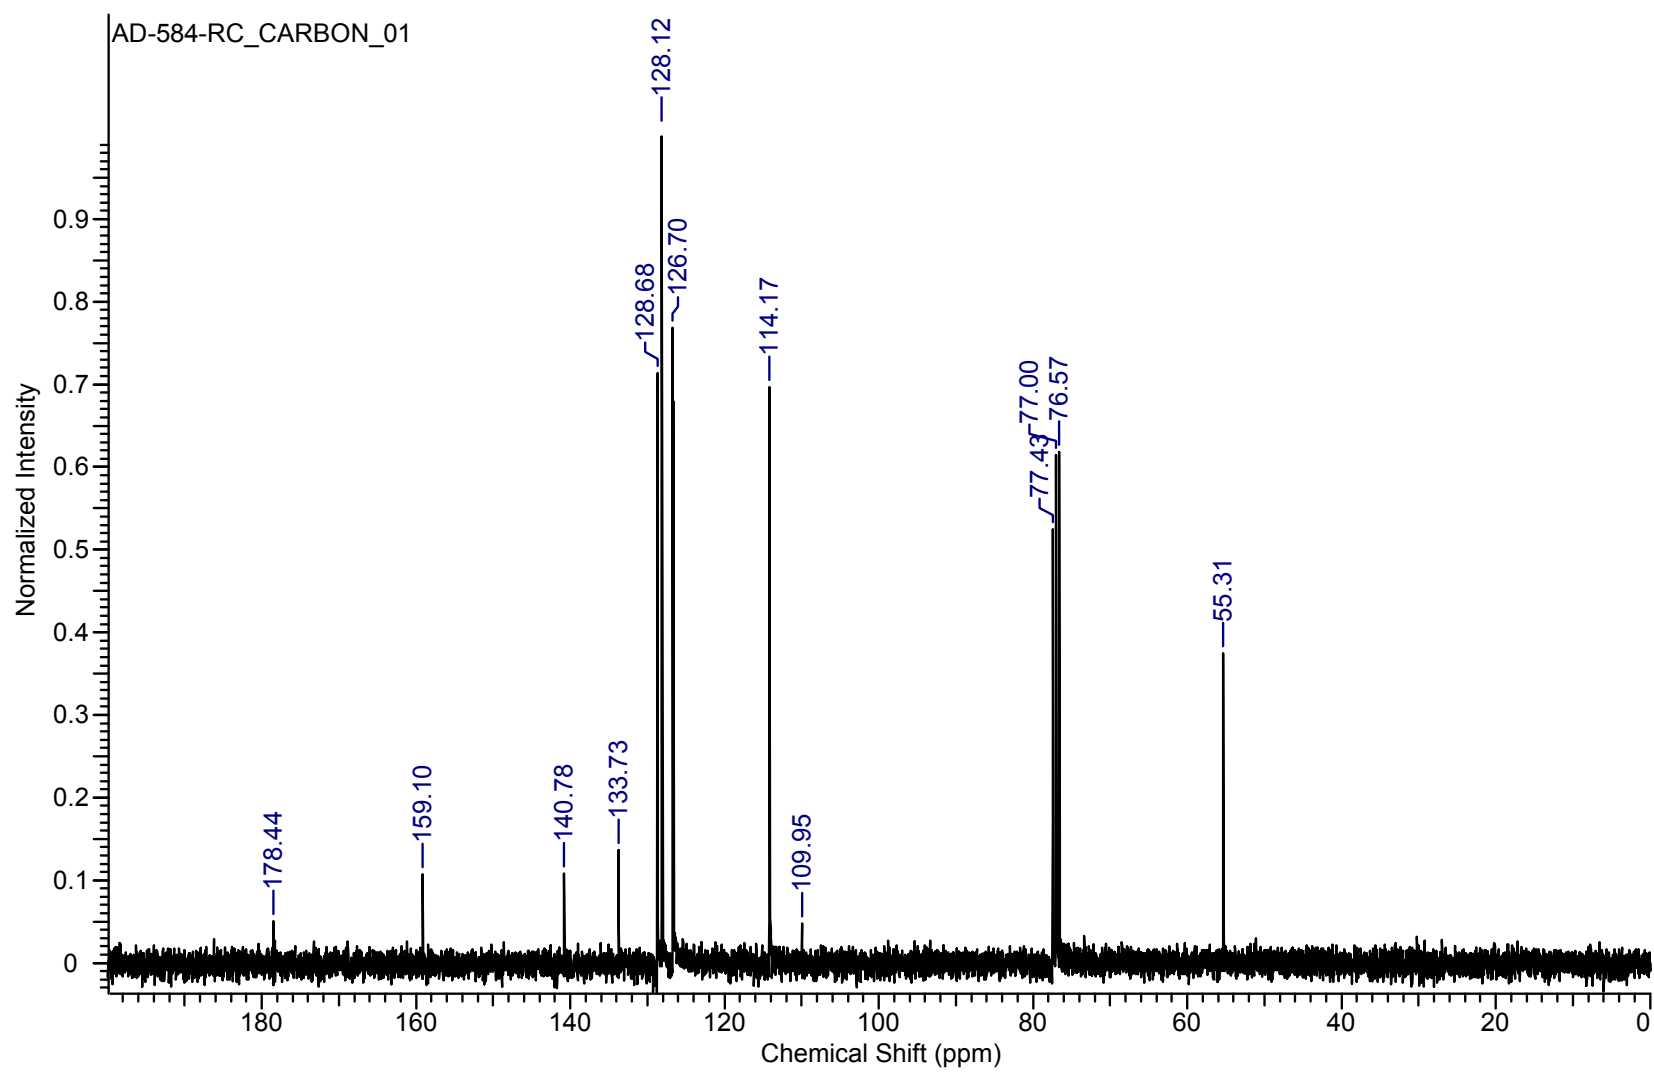



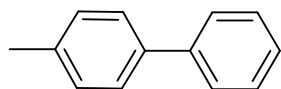

Compound **1c**  
 $^1\text{H-NMR}$ , 400 MHz,  $\text{CDCl}_3$

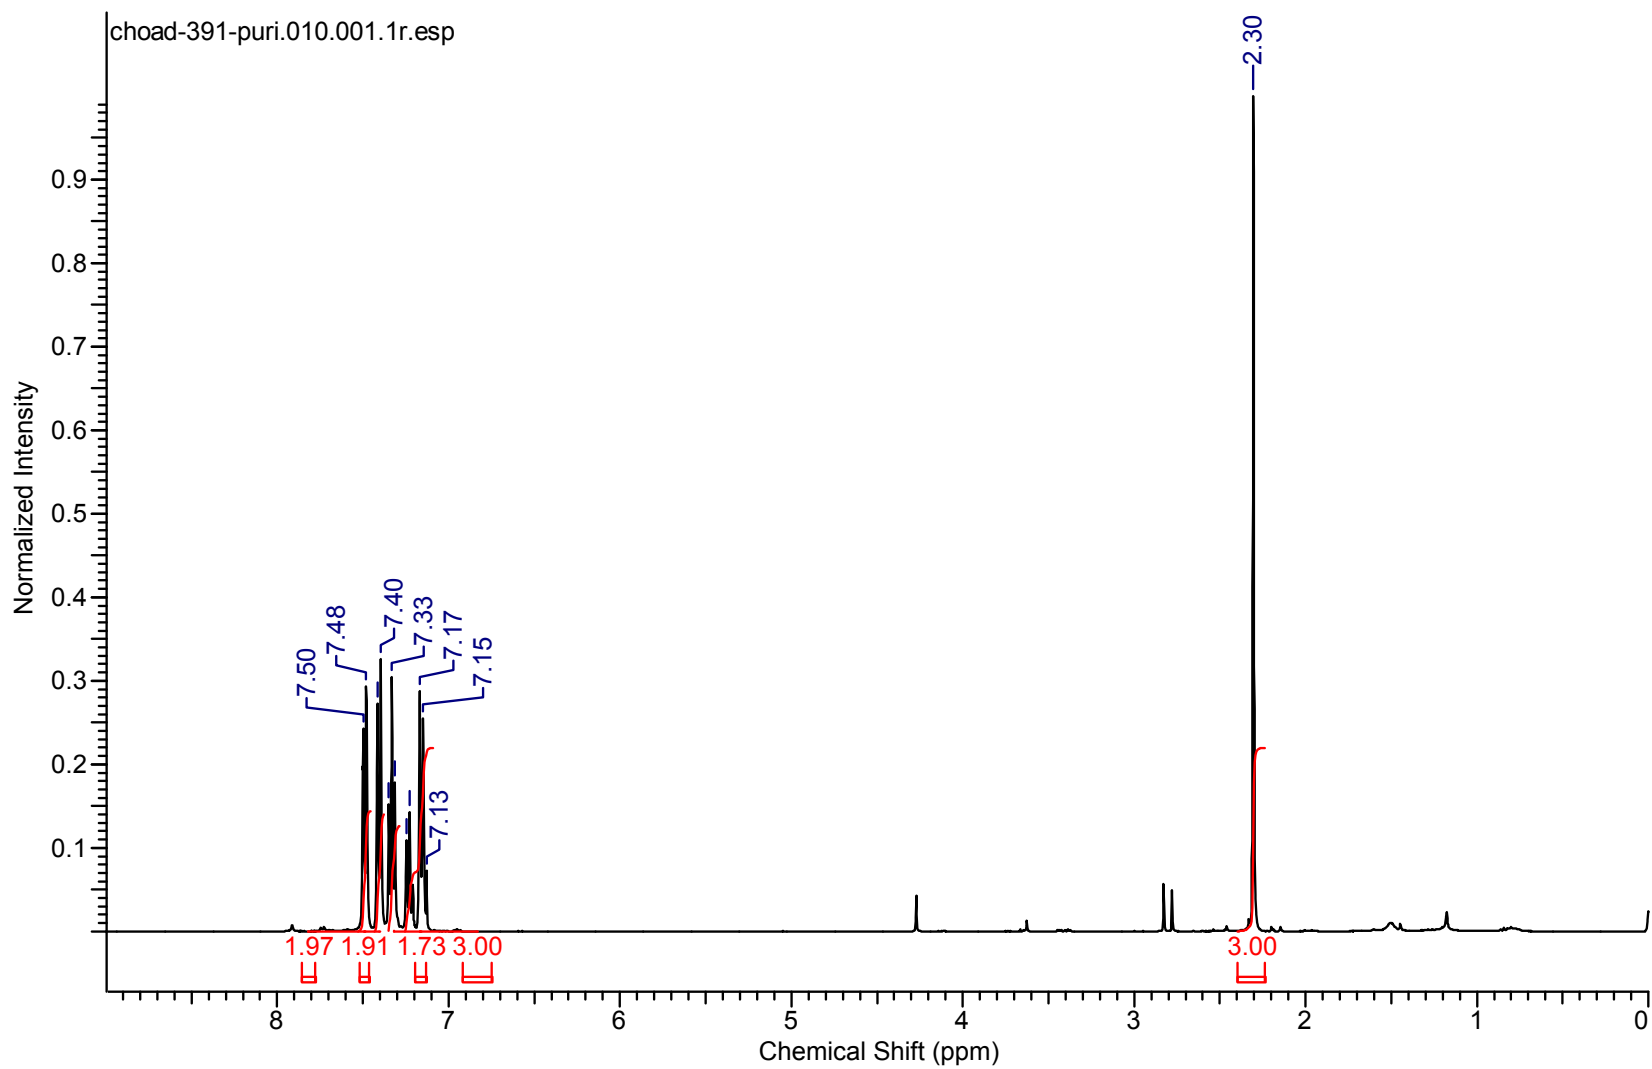

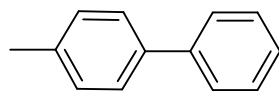

Compound **1c**

$^{13}\text{C}$ -NMR, 100 MHz,  $\text{CDCl}_3$

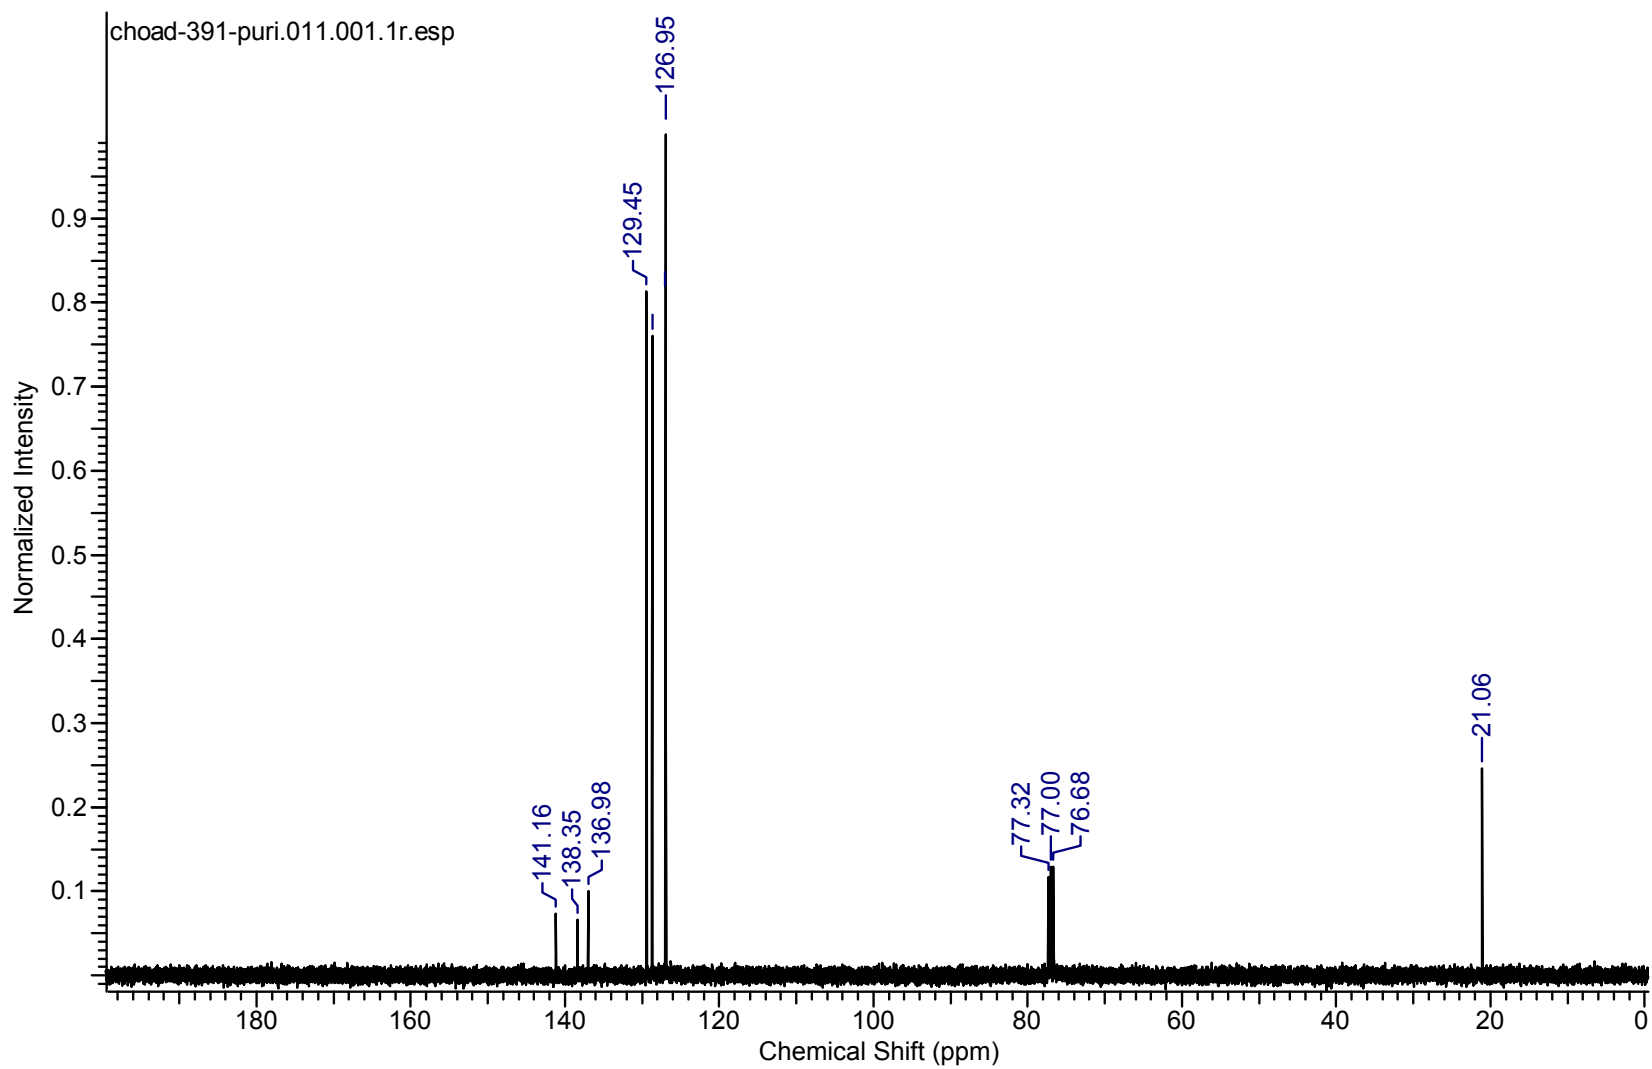

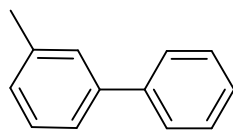

Compound **1d**

$^1\text{H-NMR}$ , 300 MHz,  $\text{CDCl}_3$

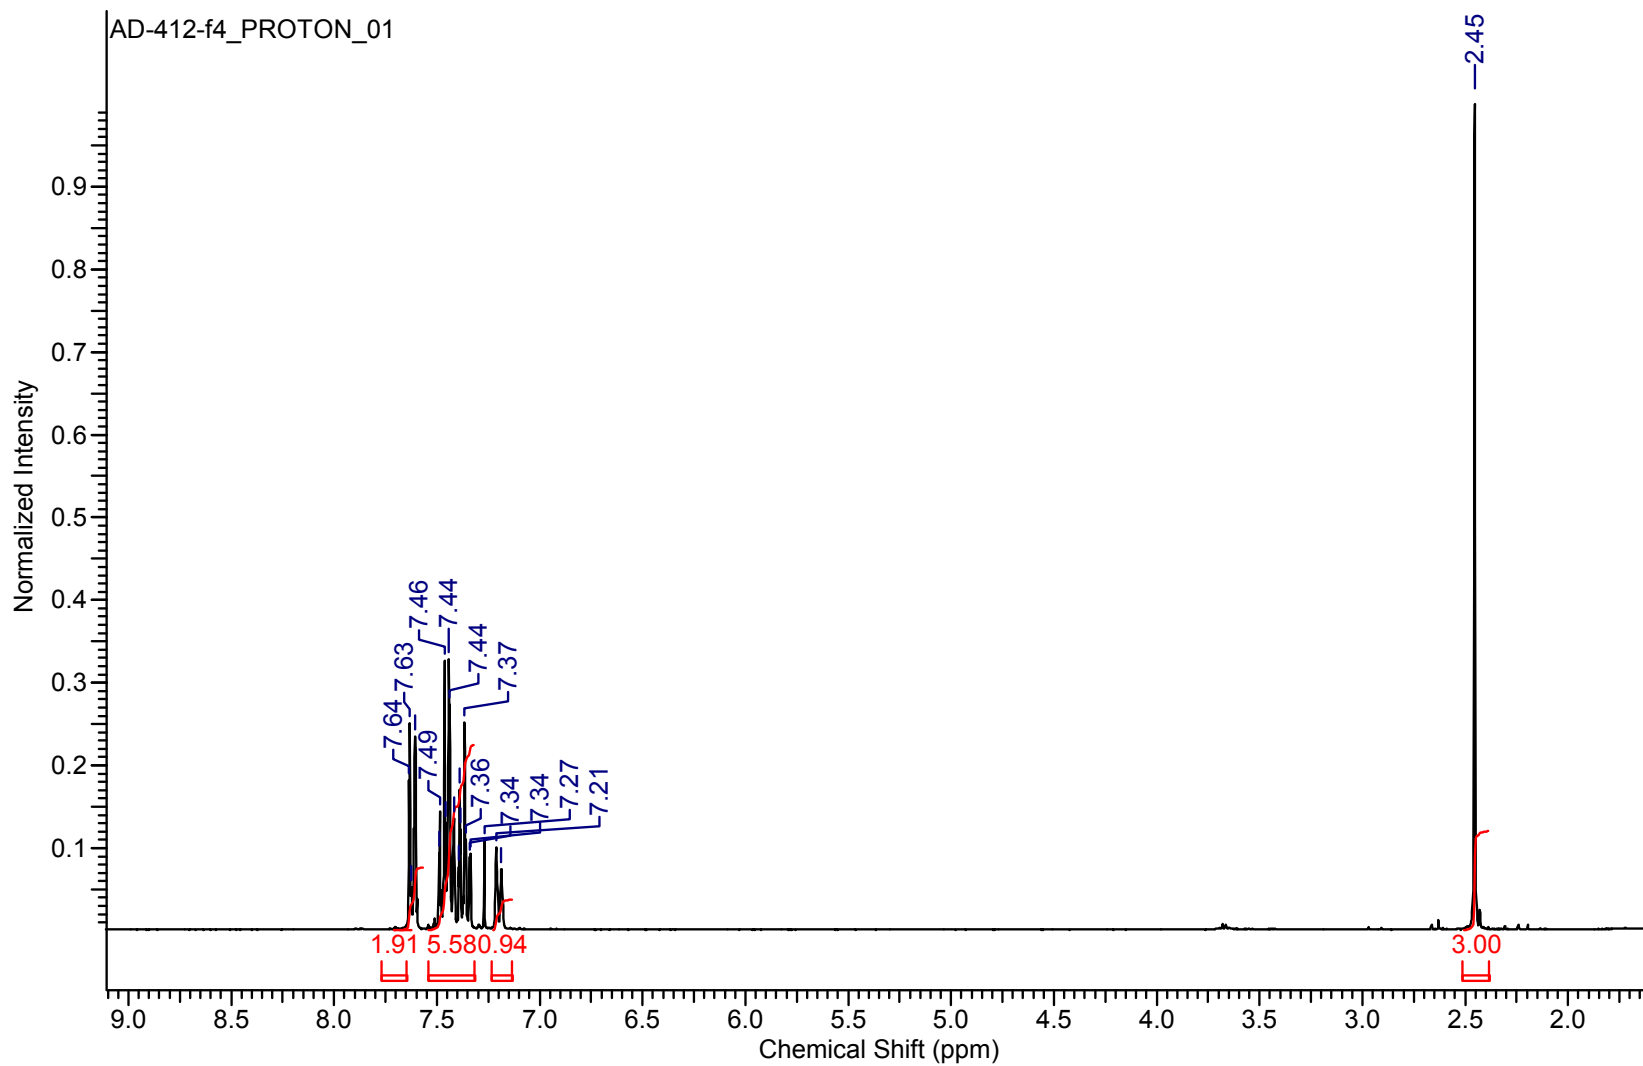

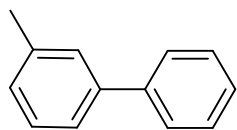

Compound **1d**

$^{13}\text{C-NMR}$ , 75 MHz,  $\text{CDCl}_3$

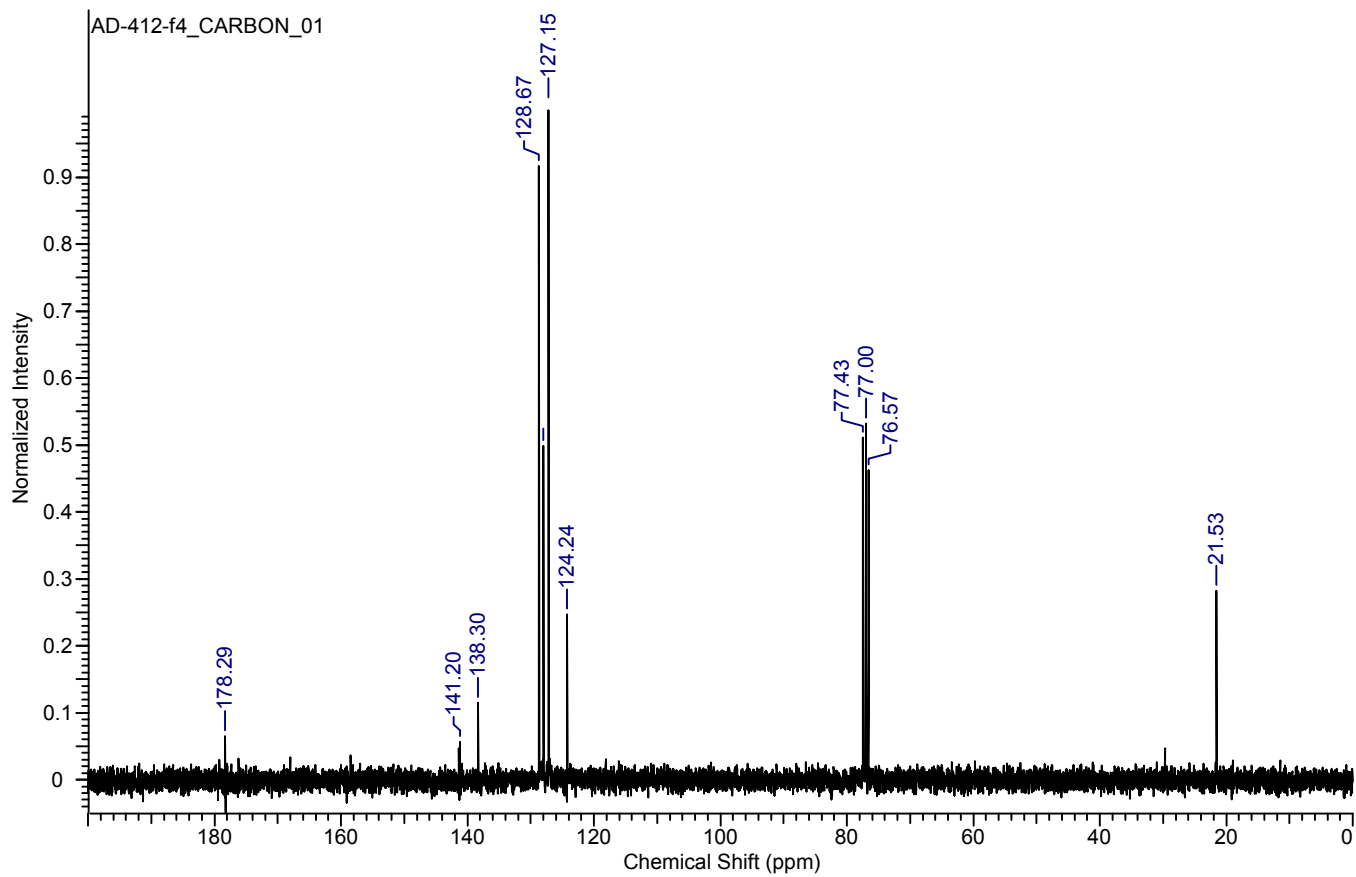

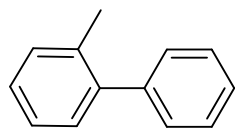

Compound **1e**  
<sup>1</sup>H-NMR, 300 MHz, CDCl<sub>3</sub>

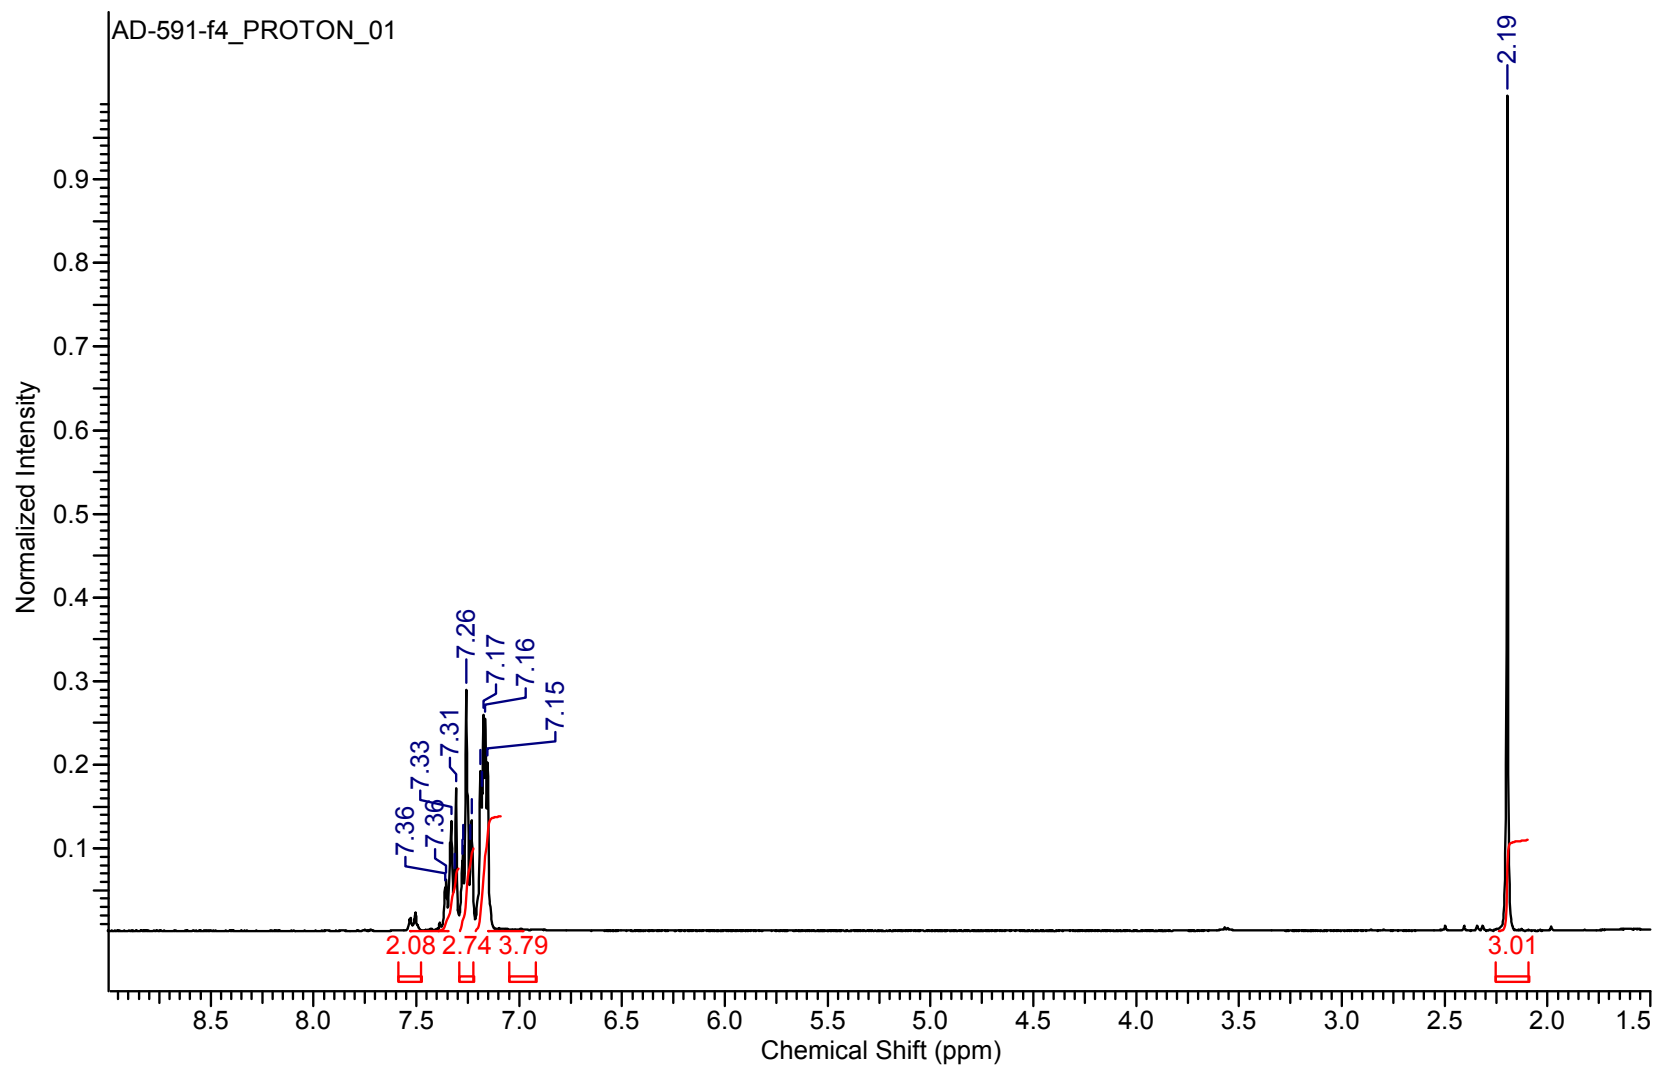

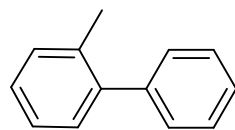

Compound **1e**

$^{13}\text{C-NMR}$ , 75 MHz,  $\text{CDCl}_3$

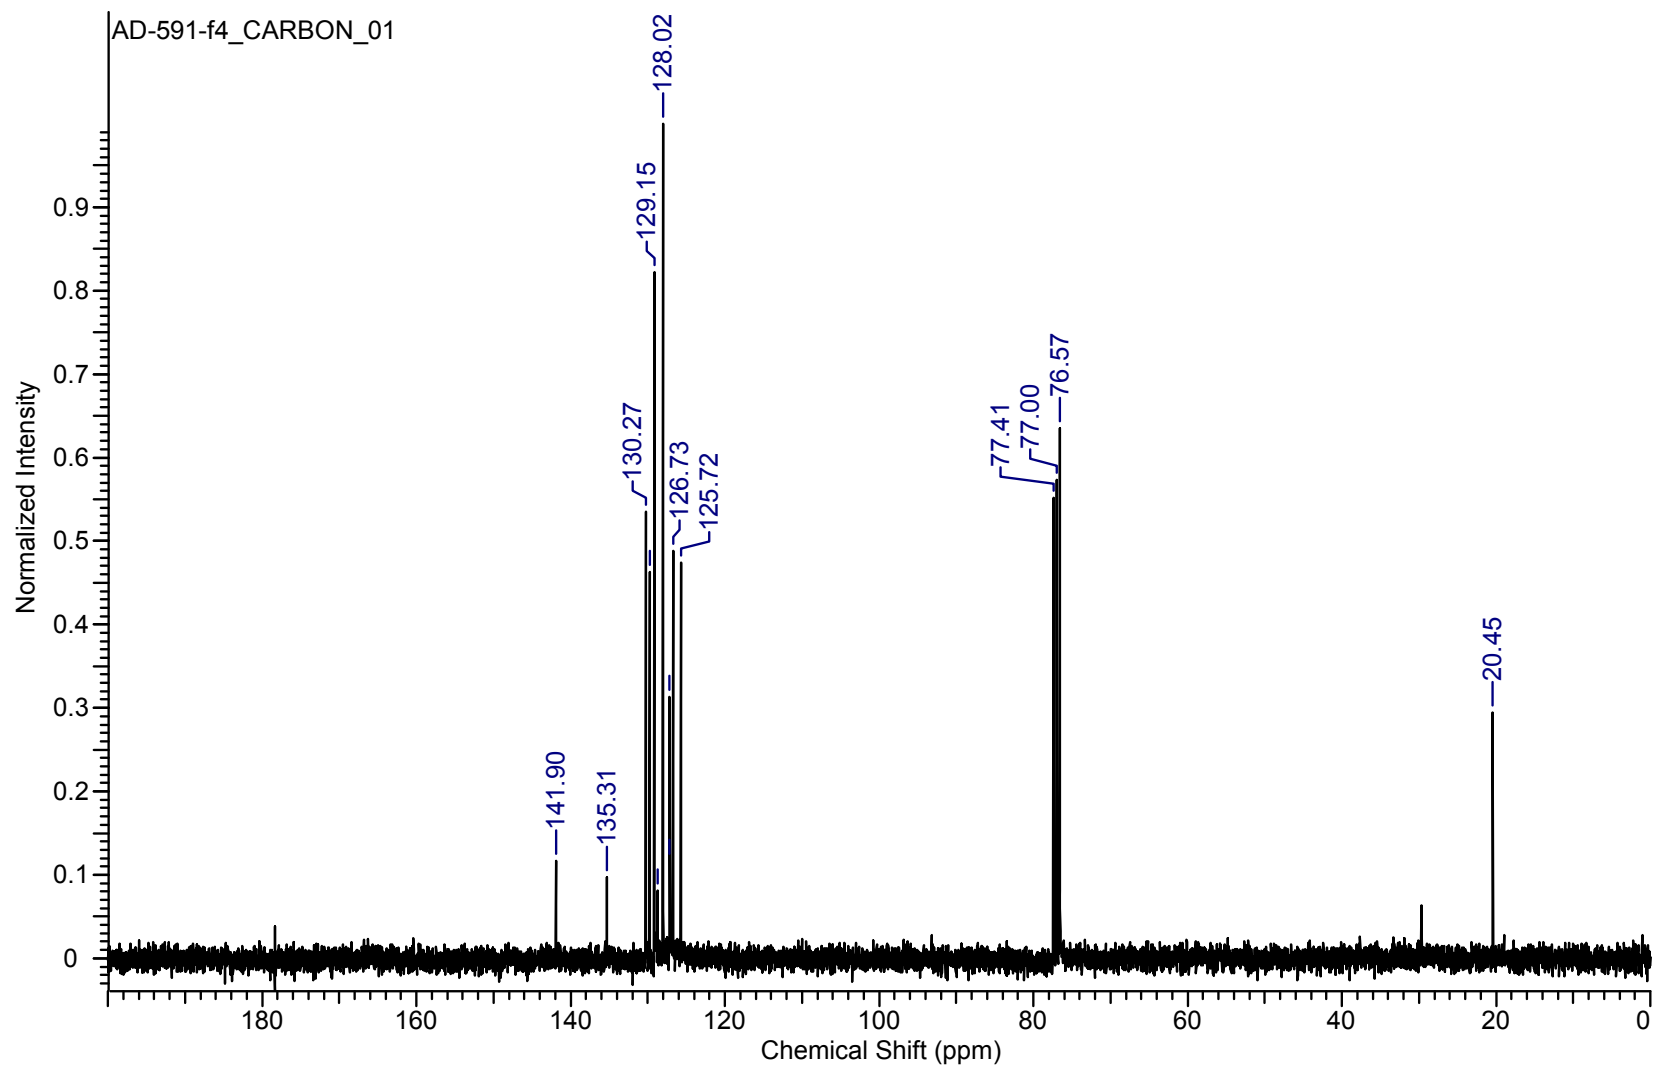

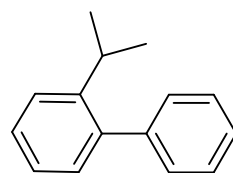

Compound **1f**  
<sup>1</sup>H-NMR, 300 MHz, CDCl<sub>3</sub>

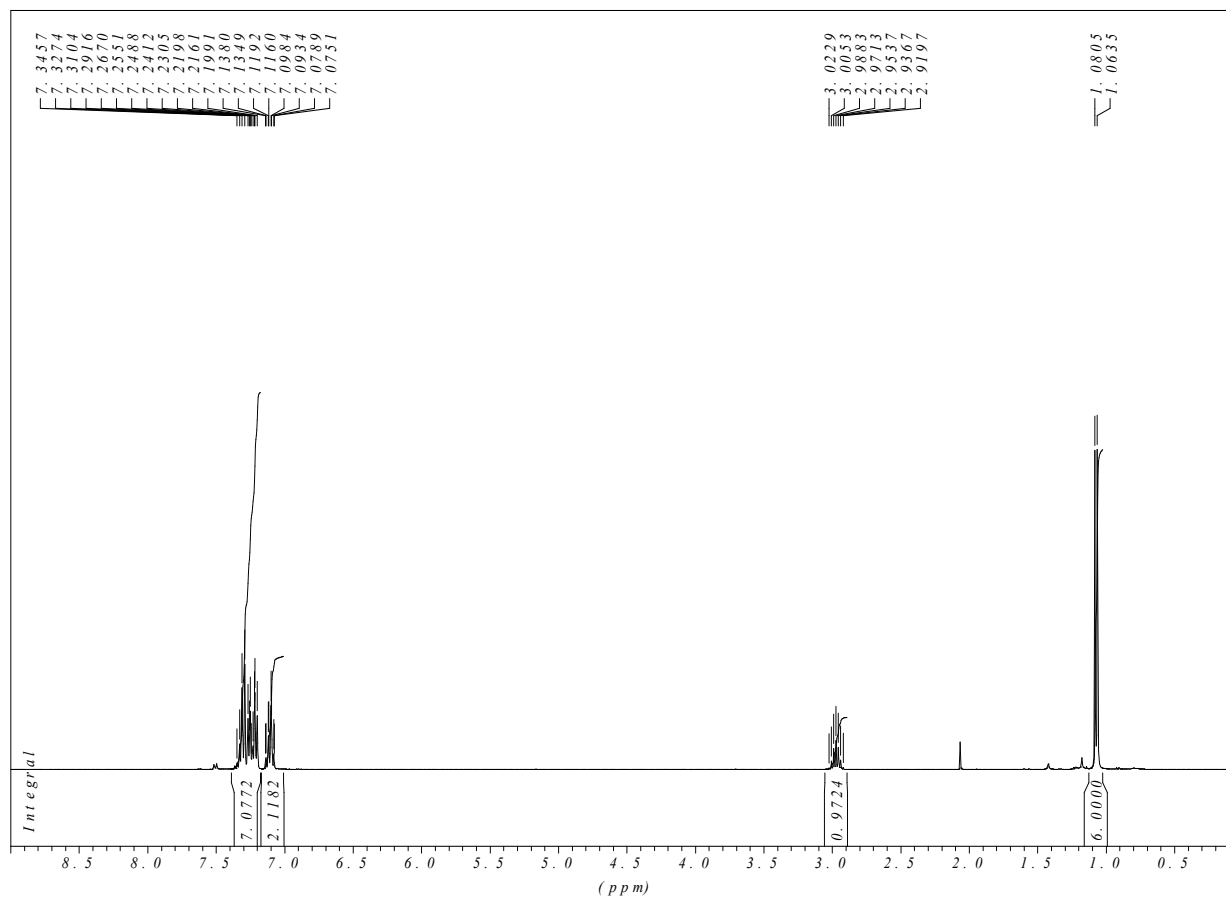

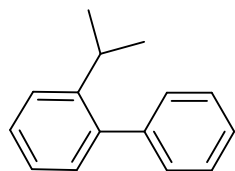

Compound **1f**

$^1\text{H-NMR}$ , 300 MHz,  $\text{CDCl}_3$

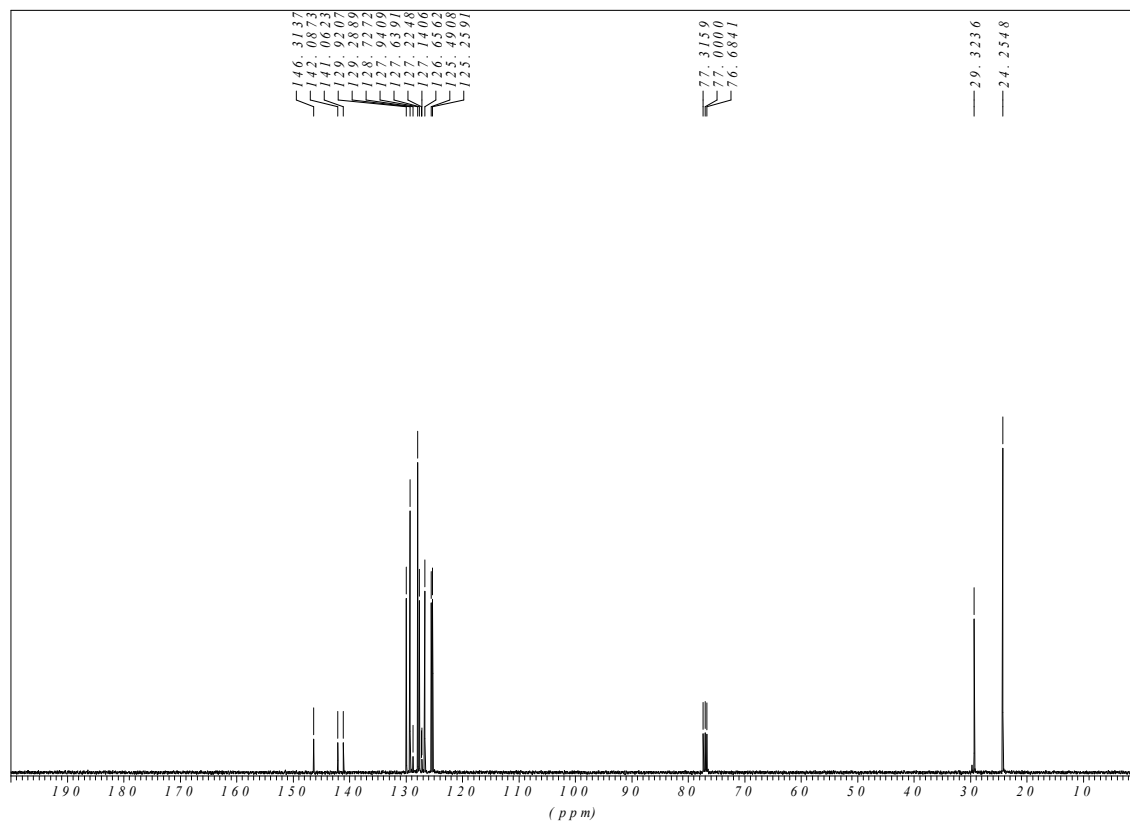



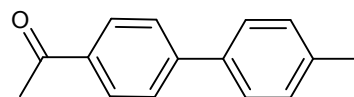

Compound **1g**

<sup>1</sup>H-NMR, 400 MHz, CDCl<sub>3</sub>

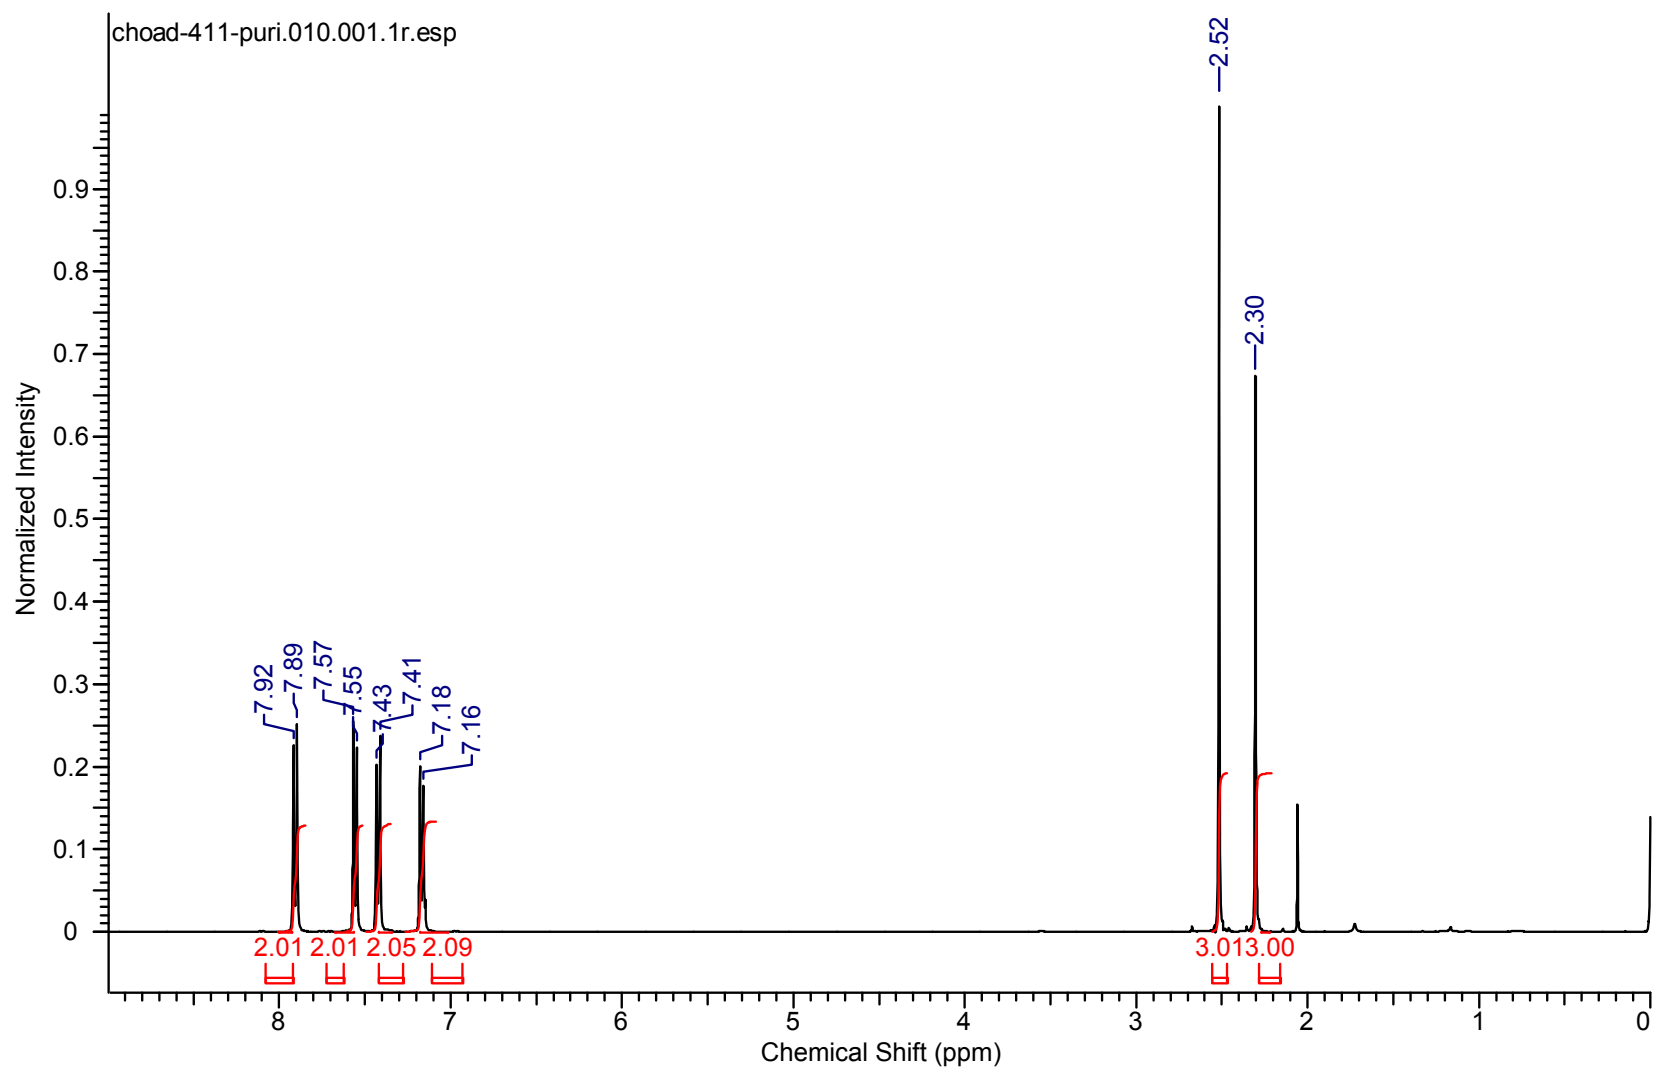

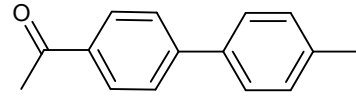

Compound **1g**

$^{13}\text{C-NMR}$ , 100 MHz,  $\text{CDCl}_3$

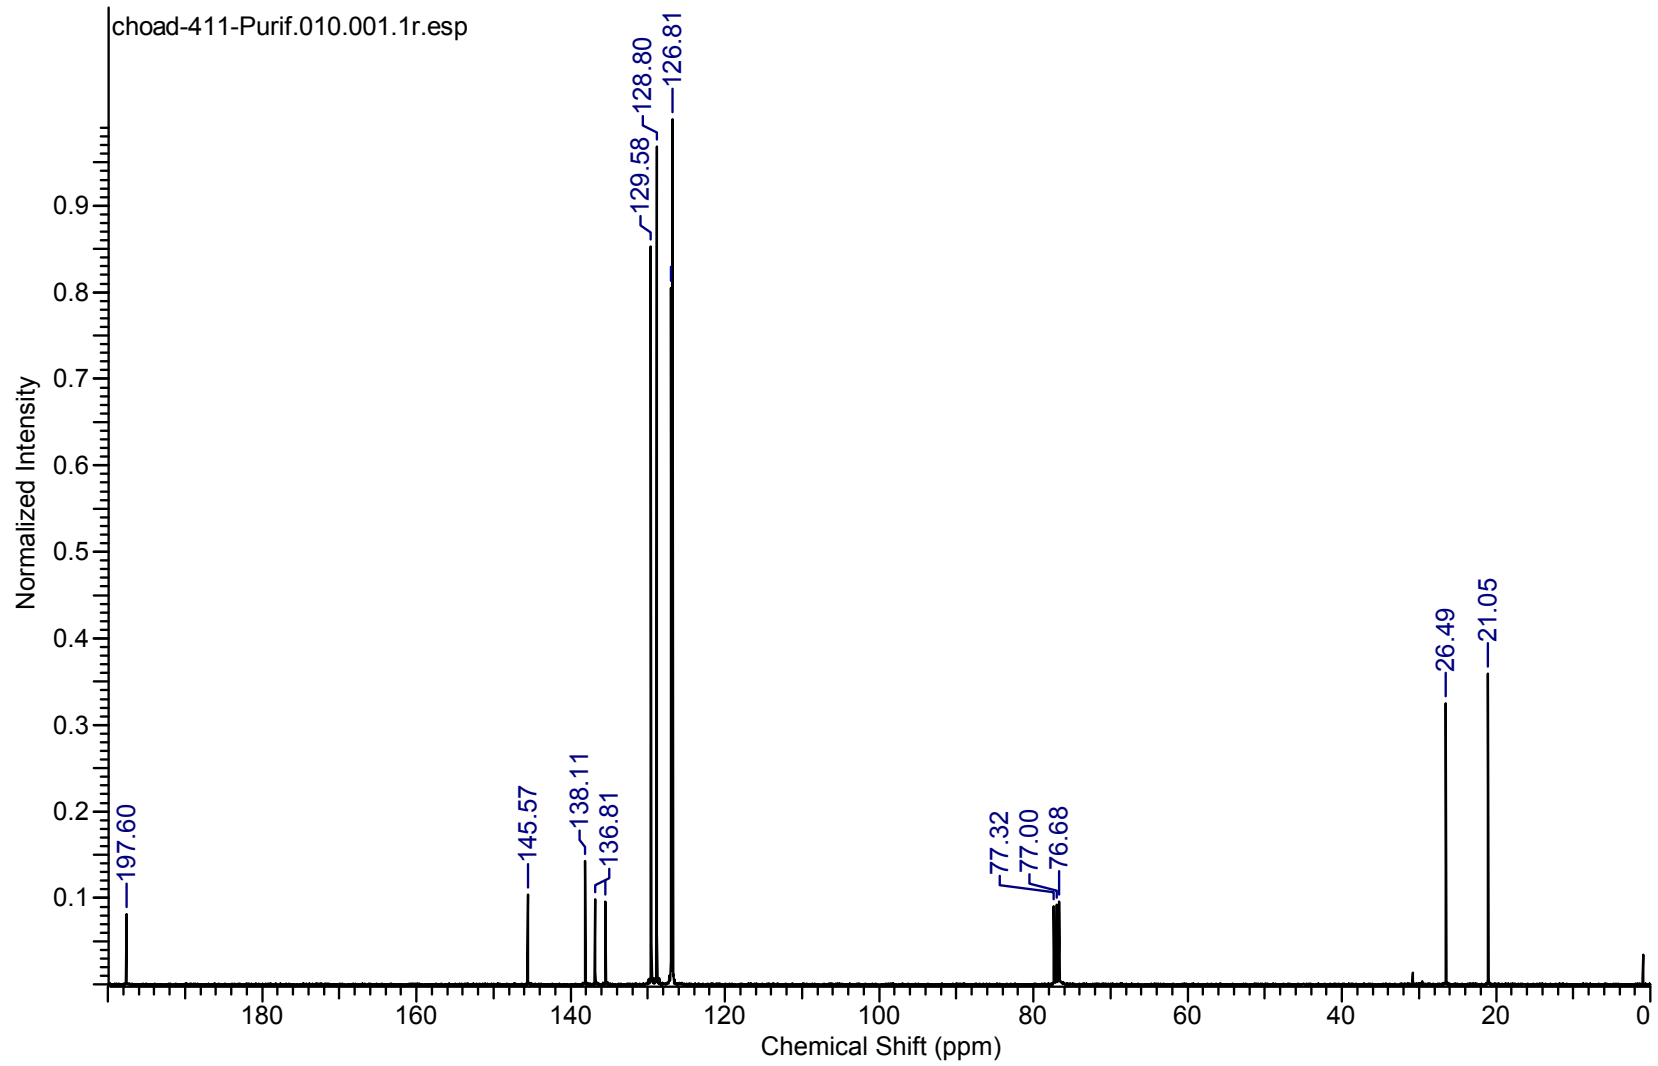

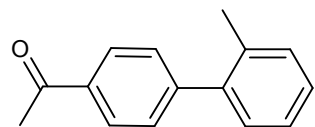

Compound **1h**

$^1\text{H-NMR}$ , 300 MHz,  $\text{CDCl}_3$

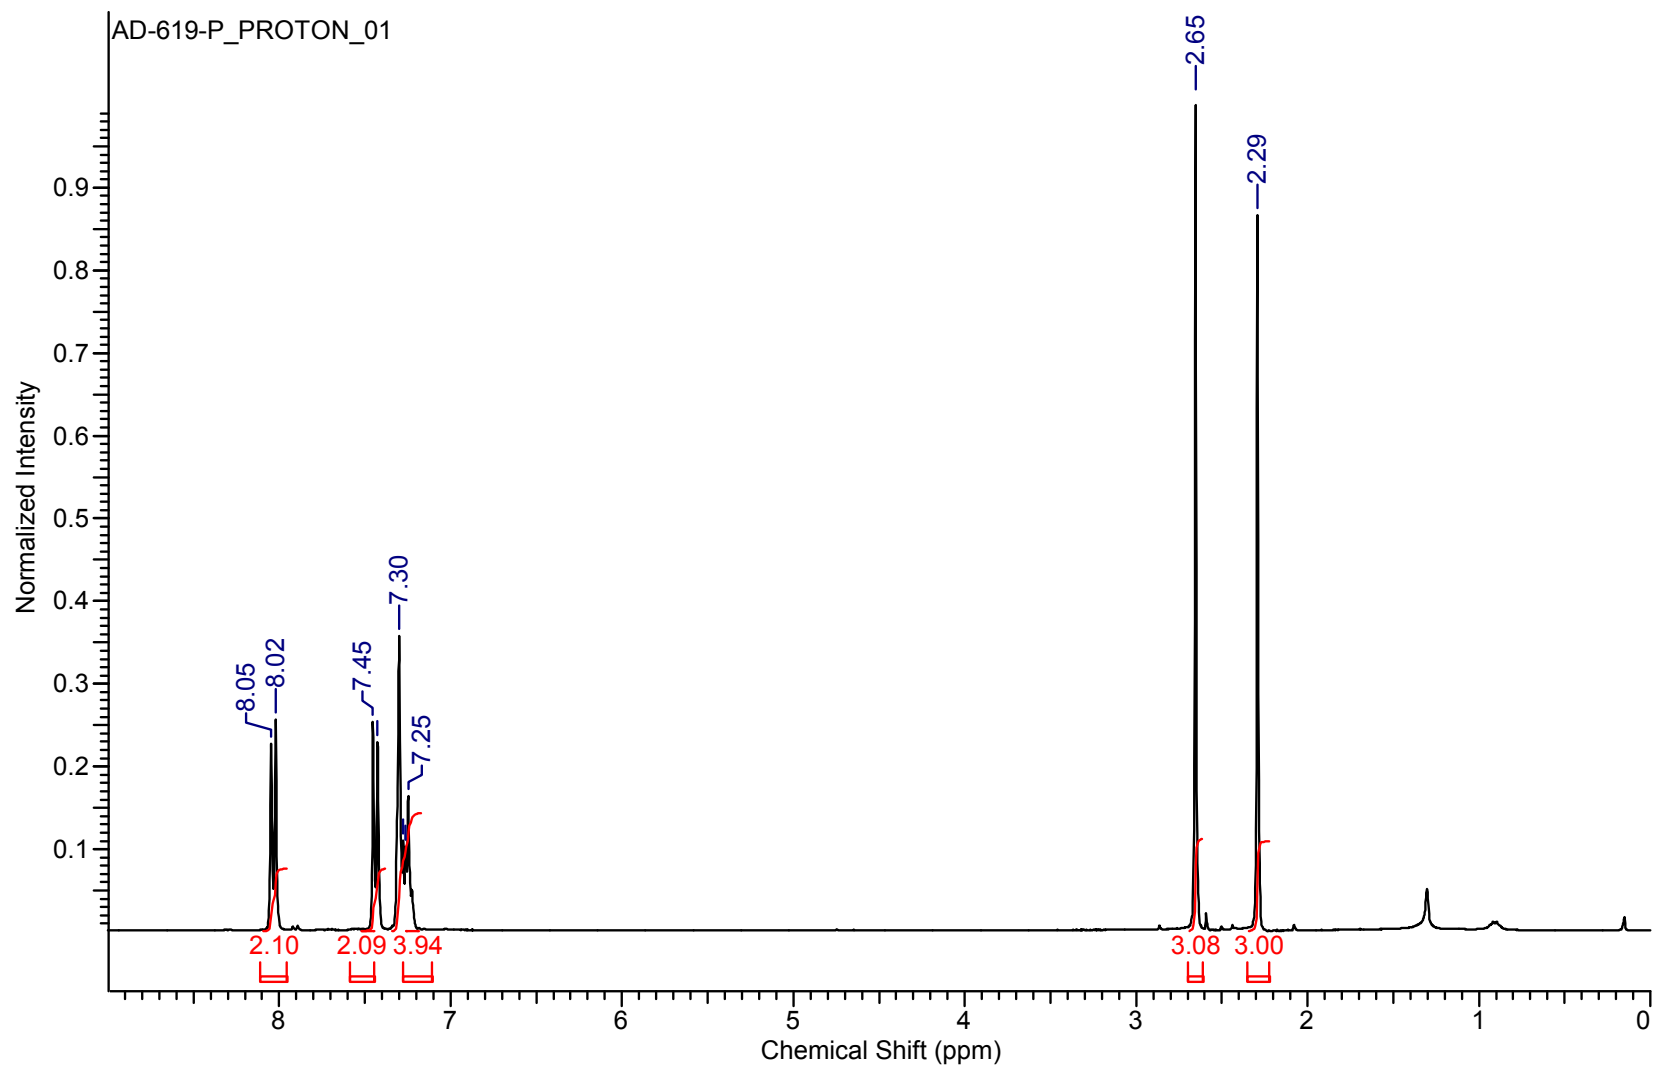

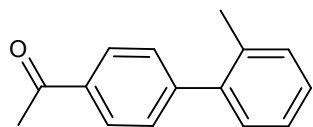

Compound **1h**

$^{13}\text{C-NMR}$ , 75 MHz,  $\text{CDCl}_3$

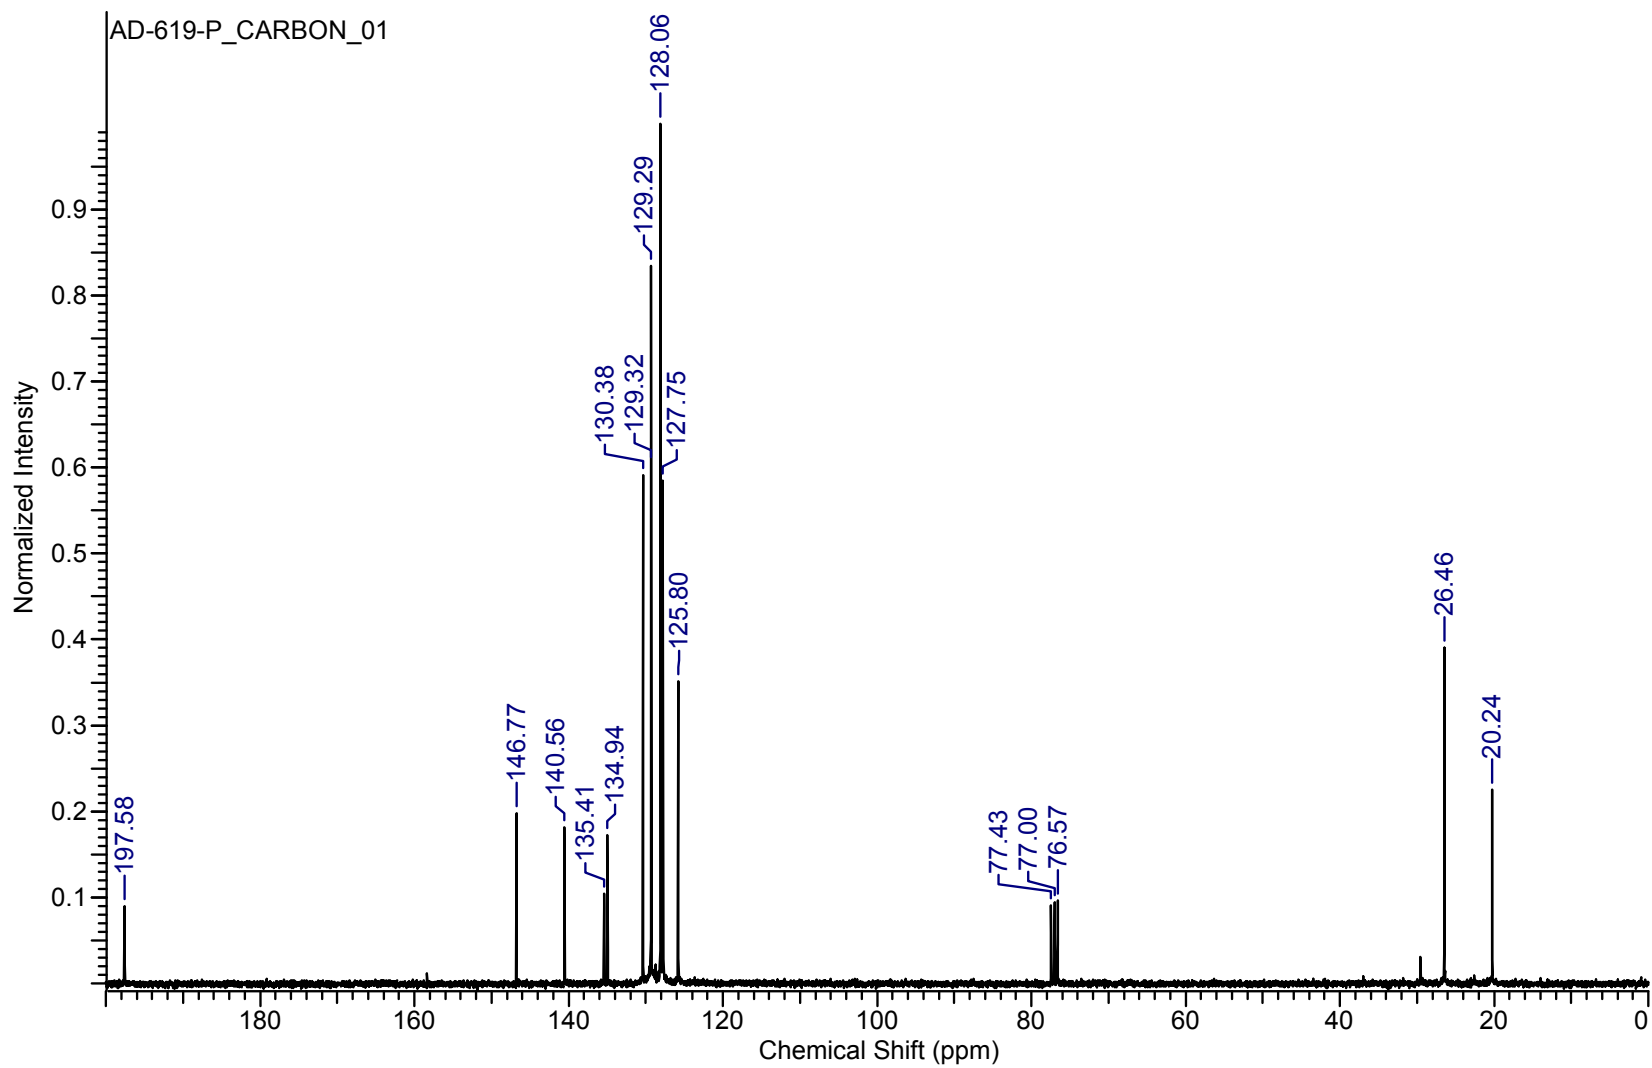

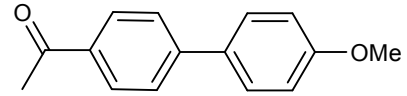

Compound **1i**  
 $^1\text{H-NMR}$ , 300 MHz,  $\text{CDCl}_3$

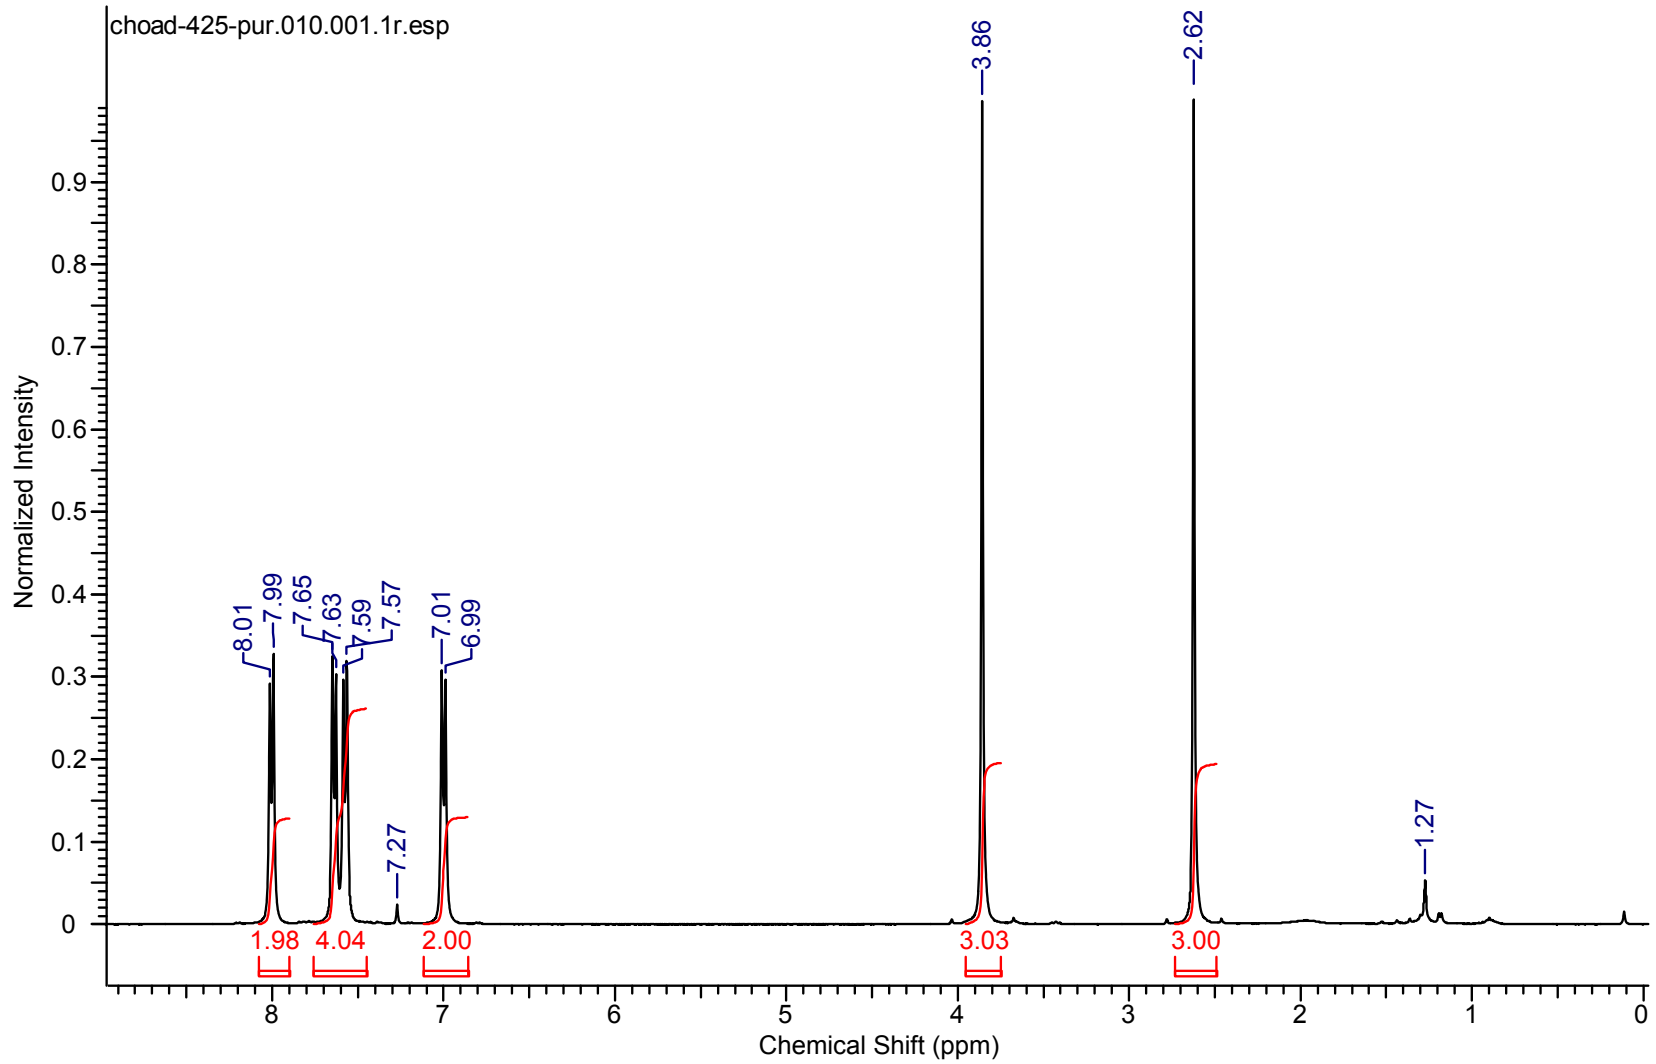

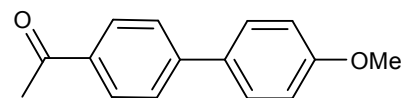

Compound **1i**

$^{13}\text{C-NMR}$ , 75 MHz,  $\text{CDCl}_3$

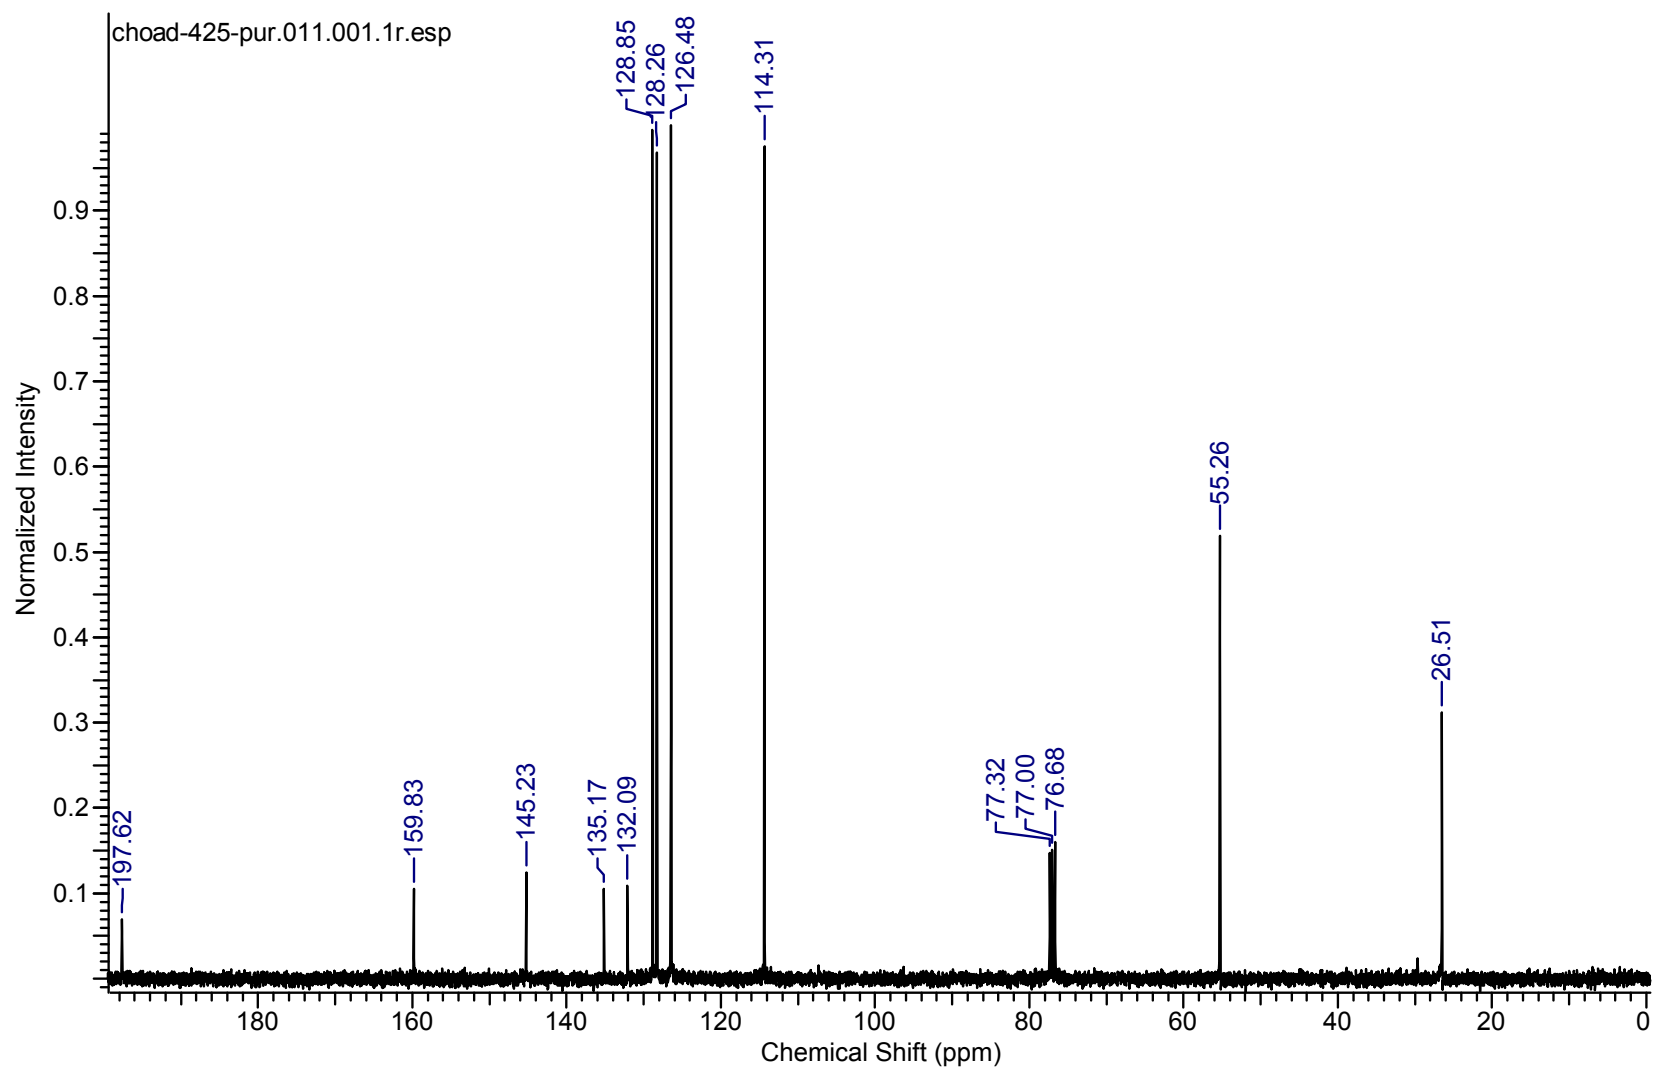



---

[1] C. Diebold, J.-M. Becht, J. Lu, P. H. Toy, C. Le Drian, *Eur. J. Org. Chem.* **2012**, 893.

[2] S. Schweizer, J.-M. Becht, C. Le Drian, *Org. Lett.* **2007**, 9, 3777.
